1 **Omicron-induced interferon signalling prevents influenza A virus**  
2 **infection**

3 **Running title: Omicron inhibits influenza A virus infection**

4 Denisa Bojkova<sup>1</sup>, Marco Bechtel<sup>1</sup>, Tamara Rothenburger<sup>1</sup>, Joshua D. Kandler<sup>1</sup>,  
5 Lauren Hayes<sup>2</sup>, Ruth Olmer<sup>3</sup>, Martin Ulrich<sup>3</sup>, Danny Jonigk<sup>4,5</sup>, Sandra Ciesek<sup>1,6,7</sup>, Mark  
6 N. Wass<sup>2</sup>, Martin Michaelis<sup>2\*</sup>, Jindrich Cinatl jr.<sup>1,8\*</sup>

7 <sup>1</sup> Institute for Medical Virology, University Hospital, Goethe University, Frankfurt am  
8 Main, Germany

9 <sup>2</sup> School of Biosciences, University of Kent, Canterbury CT2 7NJ, UK

10 <sup>3</sup> Leibniz Research Laboratories for Biotechnology and Artificial Organs (LEBAO),  
11 Department of Cardiothoracic, Transplantation and Vascular Surgery (HTTG),  
12 REBIRTH-Research Center for Translational Regenerative Medicine, Biomedical  
13 Research in Endstage and Obstructive Lung Disease Hannover (BREATH), German  
14 Center for Lung Research (DZL), Hannover Medical School, Carl-Neuberg-Straße 1,  
15 30625 Hannover, Germany

16 <sup>4</sup> Institute of Pathology, Hannover Medical School (MHH), Carl-Neuberg-Straße ,1  
17 30625 Hannover, Germany

18 <sup>5</sup> Biomedical Research in Endstage and Obstructive Lung Disease Hannover  
19 (BREATH), The German Center for Lung Research (Deutsches Zentrum für  
20 Lungenforschung, DZL), Hannover Medical School (MHH), Carl-Neuberg-Straße 1,  
21 30625 Hannover, Germany

22 <sup>6</sup> German Center for Infection Research, DZIF, External partner site, Theodor-Stern-  
23 Kai 7, 60590 Frankfurt am Main, Germany

24 <sup>7</sup> Fraunhofer Institute for Molecular Biology and Applied Ecology (IME), Branch  
25 Translational Medicine und Pharmacology, Theodor-Stern-Kai 7, 60590 Frankfurt am  
26 Main, Germany

27 <sup>8</sup> Dr. Petra Joh-Forschungshaus, Komturstr. 3A, 60528 Frankfurt am Main, Germany  
28

29 \* Corresponding authors:

30 Jindrich Cinatl jr., Institute for Medical Virology, University Hospital, Goethe University,  
31 Paul Ehrlich-Straße 40, 60596 Frankfurt am Main, Germany; phone +49 69 6301  
32 6409; e-mail [Cinatl@em.uni-frankfurt.de](mailto:Cinatl@em.uni-frankfurt.de)

33 Martin Michaelis, School of Biosciences, University of Kent, Canterbury CT2 7NJ, UK;  
34 phone +44 1227 82 7804; e-mail [M.Michaelis@kent.ac.uk](mailto:M.Michaelis@kent.ac.uk)

35 **Abstract**

36           Recent findings in permanent cell lines suggested that SARS-CoV-2 Omicron  
37 BA.1 induces a stronger interferon response than Delta. Here, we show that BA.1 and  
38 BA.5 but not Delta induce an antiviral state in air-liquid interface (ALI) cultures of  
39 primary human bronchial epithelial (HBE) cells and primary human monocytes. Both  
40 Omicron subvariants caused the production of biologically active type I ( $\alpha/\beta$ ) and III  
41 ( $\lambda$ ) interferons and protected cells from super-infection with influenza A viruses.  
42 Notably, abortive Omicron infection of monocytes was sufficient to protect monocytes  
43 from influenza A virus infection. Interestingly, while influenza-like illnesses surged  
44 during the Delta wave in England, their spread rapidly declined upon the emergence  
45 of Omicron. Mechanistically, Omicron-induced interferon signalling was mediated via  
46 double-stranded RNA recognition by MDA5, as MDA5 knock-out prevented it. The  
47 JAK/ STAT inhibitor baricitinib inhibited the Omicron-mediated antiviral response,  
48 suggesting it is caused by MDA5-mediated interferon production, which activates  
49 interferon receptors that then trigger JAK/ STAT signalling. In conclusion, our study 1)  
50 demonstrates that only Omicron but not Delta induces a substantial interferon  
51 response in physiologically relevant models, 2) shows that Omicron infection protects  
52 cells from influenza A virus super-infection, and 3) indicates that BA.1 and BA.5 induce  
53 comparable antiviral states.

54

55 **Keywords:** SARS-CoV-2; COVID-19; interferon; monocytes; influenza; super-  
56 infection; antiviral state; BA.1; BA.5; Delta

57

## 58 **Introduction**

59 SARS-CoV-2, the coronavirus that causes COVID-19, has caused the worst  
60 pandemic since the Spanish Flu in 1918-1920 [Bastard et al., 2022]. Virus-induced  
61 interferon signalling has been shown to be critically involved in determining COVID-  
62 19 severity [Bastard et al., 2022; Chiale et al., 2022]. Individuals with defects in their  
63 interferon response are predisposed to life-threatening COVID-19 [Bastard et al.,  
64 2022; Chiale et al., 2022], and a particularly pronounced interferon-related innate  
65 immune response is anticipated to contribute to the lower COVID-19 severity observed  
66 in children [Borrelli et al., 2021].

67 Recent findings suggested that SARS-CoV-2 Omicron BA.1 displays a lower  
68 interferon antagonism than Delta [Bojkova et al., 2022; Bojkova et al., 2022a]. BA.1  
69 and Delta viruses showed a similar replication pattern in interferon-deficient Vero cells,  
70 but BA.1 replication was attenuated relative to Delta in interferon competent Calu-3,  
71 Caco-2, and Caco-2-F03 (a highly SARS-CoV-2-susceptible Caco-2 subline [Bojkova  
72 et al., 2022b]) cells [Bojkova et al., 2022; Hu et al., 2022; Shuai et al., 2022]. Moreover,  
73 BA.1 induced a more pronounced interferon response than Delta [Bojkova et al., 2022;  
74 Bojkova et al., 2022a].

75 Here, we investigated Delta, BA.1, and BA.5 replication in air-liquid interface  
76 (ALI) cultures of primary human bronchial epithelial (HBE) cells and primary human  
77 monocytes. To examine whether SARS-CoV-2-induced interferon induction results in  
78 a biologically relevant antiviral state, we further determined the impact of Delta, BA.1,  
79 and BA.5 infection on influenza A virus replication in ALI HBE cultures (H1N1) and  
80 monocytes (H1N1, H5N1), as interferon signalling is considered to be a major  
81 influenza A virus restriction factor [McKellar et al., 2021].

## 82 **Results**

### 83 **Infection kinetics and interferon response induction by Omicron BA.1 and Delta** 84 **in air-liquid-interface (ALI) cultures of primary human bronchial epithelial (HBE)** 85 **cells**

86 BA.1 displayed faster replication kinetics than Delta in ALI HBE cultures (Figure  
87 1), as indicated by high SARS-CoV-2 nucleoprotein (NP), genomic RNA levels, and  
88 caspase 3/7 activity (which reflects SARS-CoV-2 replication independently of whether  
89 the virus causes cytotoxicity resulting in a cytopathogenic effect in a cell culture model  
90 [Bojkova et al., 2022b]) (Figure 1B-D). However, the replication of both SARS-CoV-2  
91 variants resulted in comparable peak NP and genomic RNA levels (Figure 1B-D).  
92 While the BA.1 levels declined after a peak (at 24h post infection for NP and 72h for  
93 genomic RNA), Delta levels continued to increase until 120h post infection (Figure 1B-  
94 D). These findings are in accordance with previous findings showing that BA.1  
95 replicates faster than other variants in bronchial cells [Hui et al., 2022]. Independently  
96 of the replication kinetics BA.1 and Delta caused similar reductions of the ALI HBE  
97 barrier integrity (Figure 1E).

98 Also in agreement with previous findings [Alfi et al., 2022; Bojkova et al., 2022;  
99 Bojkova et al., 2022a], BA.1 induced a stronger interferon response than Delta, as  
100 indicated by the abundance and phosphorylation levels of a range of proteins involved  
101 in interferon signalling (Figure 1F). Moreover, only BA.1 but not Delta induced the  
102 secretion of biologically active interferon- $\alpha/\beta$  (Figure 1G) and - $\lambda$  (Figure 1H) by ALI  
103 HBE cultures, as demonstrated using HEK-reporter cell lines.

104

Figure 1

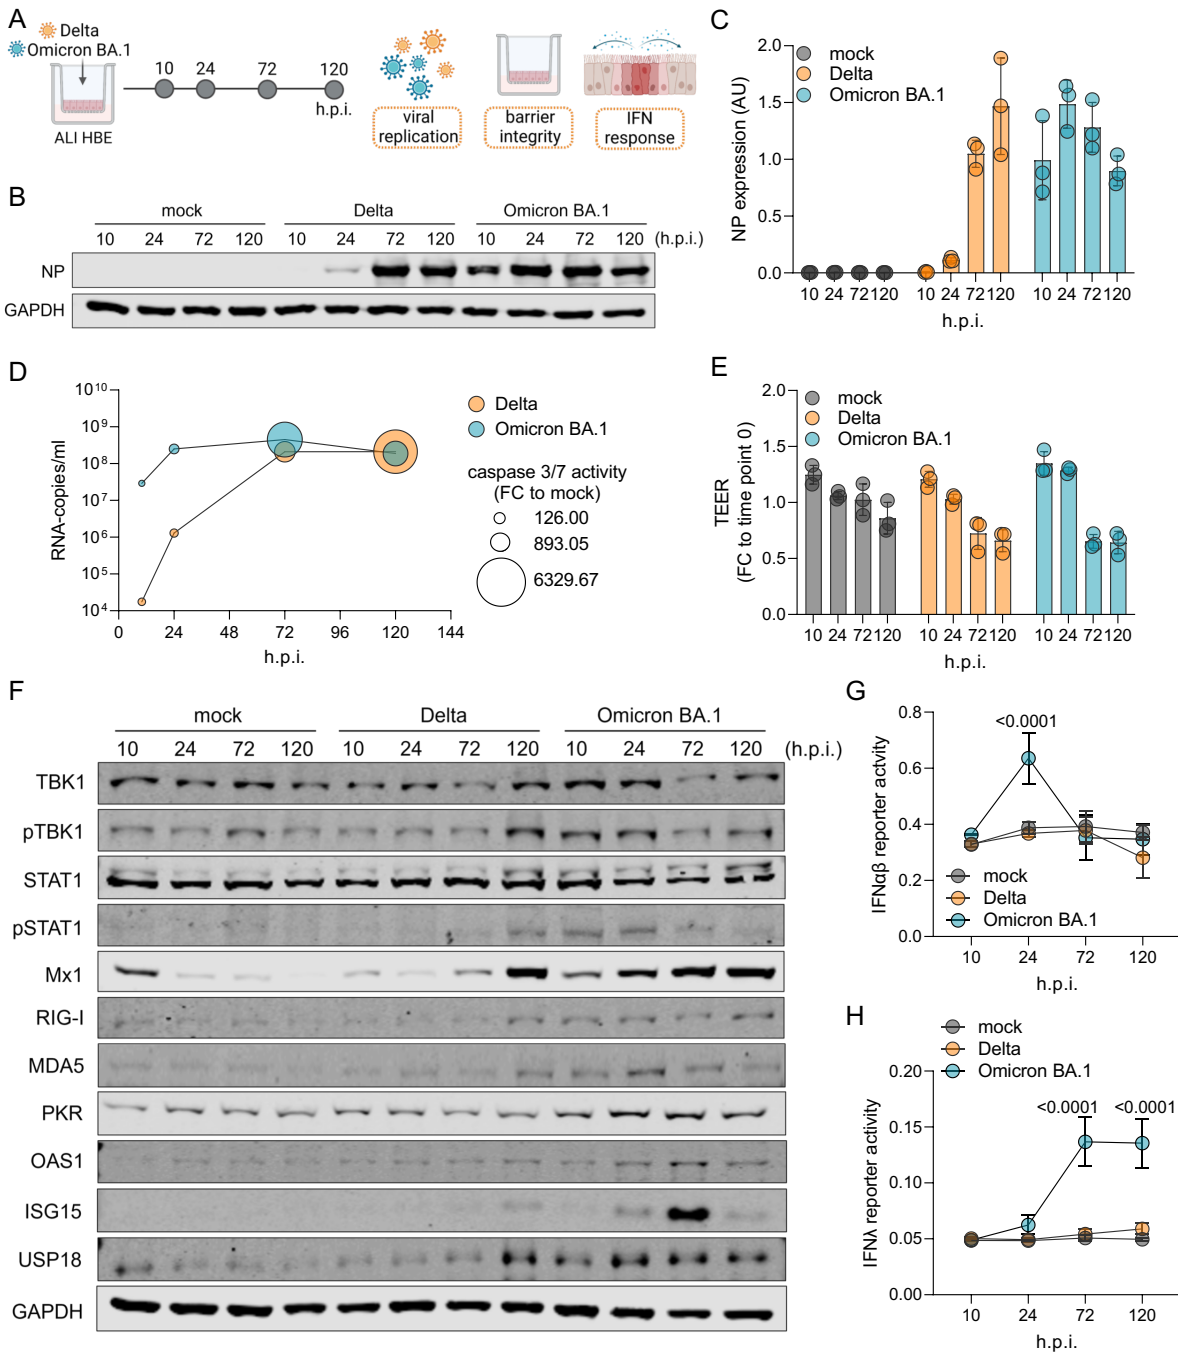

105

106 **Figure 1. Infection kinetics and interferon response induction by Omicron BA.1**

107 **and Delta in air-liquid-interface (ALI) cultures of primary human bronchial**

108 **epithelial (HBE) cells. (A) Schematic depiction of the experimental set-up. (B)**

109 **Immunoblot of cellular SARS-CoV-2 nucleoprotein (NP) levels in BA.1- and Delta (MOI**

110 **1)-infected ALI HBE cultures at different time points post infection. (C) Quantification**

111 **of NP levels (mean  $\pm$  SD) by ImageJ. (D) SARS-CoV-2 genomic RNA copy numbers**

112 (Y axis) and caspase 3/7 activity (bubble size) determined in the apical medium of  
113 BA.1- and Delta (MOI 1)-infected at different time points post infection. (E) Evaluation  
114 of barrier integrity by measurement of TEER in BA.1- and Delta (MOI 1)-infected ALI  
115 HBE cultures at different time points post infection. Bars represents mean  $\pm$  SD of  
116 three biological replicates. (F) Immunoblot indicating cellular levels of proteins  
117 involved in interferon signalling in BA.1- and Delta (MOI 1)-infected ALI HBE cultures  
118 at different time points post infection. (G,H) Interferon (IFN)- $\alpha/\beta$  (G) and IFN $\lambda$  (H)  
119 responses induced in HEK reporter cell lines by apical washes from BA.1- and Delta  
120 (MOI 1)-infected ALI HBE cultures collected at different time points post infection. P  
121 values were determined by one-way ANOVA with subsequent Tukey's test.

122

123 Interferon- $\alpha/\beta$  peaked at 24h post infection (Figure 1G), which was followed by  
124 a return to basal levels, whereas interferon- $\lambda$  remained elevated until 120h post  
125 infection (Figure 1H). Short-term interferon type I ( $\alpha/\beta$ ) responses cause a protective  
126 antiviral response, while long-term interferon activity is associated with potentially  
127 deleterious inflammation [Forero et al., 2019; King & Sprent, 2021]. In contrast,  
128 sustained interferon type III ( $\lambda$ ) responses inhibit respiratory virus replication at  
129 epithelial barriers in the respiratory tract and prevent excessive inflammation [Forero  
130 et al., 2019; Prokunina-Olsson et al., 2020; King & Sprent, 2021]. Hence, the interferon  
131 type I and III responses observed in BA.1-infected ALI HBE cultures add further  
132 evidence explaining why Omicron is less pathogenic than other SARS-CoV-2 variants  
133 like Delta [Wang et al., 2022].

134

135 **JAK/ STAT inhibition suppresses BA.1-induced interferon signalling and**  
 136 **increases BA.1 replication in air-liquid-interface (ALI) human bronchial**  
 137 **epithelial (HBE) cell cultures**

138 Interferon signalling can be induced in a STAT1-dependent and -independent  
 139 manner [Rani et al., 2010; Bastard et al., 2022; Chiale et al., 2022]. In hibition of JAK/  
 140 STAT signalling using the JAK inhibitor baricitinib significantly increased BA.1  
 141 replication in ALI HBE cultures (Figure 2), as indicated by genomic RNA copy numbers  
 142 (Figure 2B) and cellular NP levels (Figure 2C). In contrast, Delta only displayed a non-  
 143 significant trend towards higher genomic RNA copy numbers (Figure 2B) and cellular  
 144 NP levels (Figure 2C) in the presence of baricitinib. Baricitinib did not exert significant  
 145 effects on BA.1- and Delta-mediated caspase 3/7 activation (Figure 2D) and the ALI  
 146 HBE barrier function (Figure 2E), although there was a non-significant trend towards  
 147 enhanced caspase 3/7 activity in BA.1-infected ALI HBE cultures (Figure 2D).

148

Figure 2

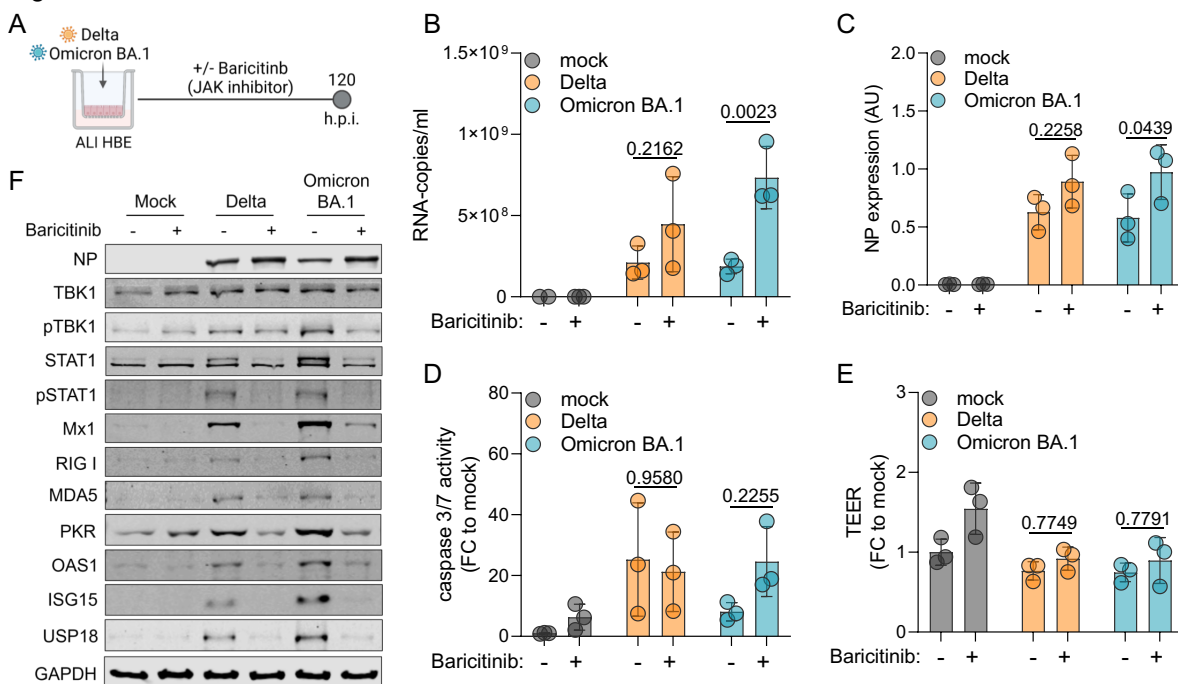

149



150 **Figure 2. Inhibition of JAK/STAT signalling promotes Omicron BA.1 replication.**

151 (A) Schematic depiction of the experimental set-up. (B) SARS-CoV-2 genomic RNA  
152 copies in apical wash of air-liquid-interface (ALI) human bronchial epithelial (HBE)  
153 cultures 120 h post SARS-CoV-2 (MOI 1) infection in the absence or presence of the  
154 JAK inhibitor baricitinib (1 $\mu$ M). Bars represent mean  $\pm$  SD of three biological replicates.  
155 (C) NP levels in SARS-CoV-2 (MOI 1)-infected ALI HBE cultures in the absence or  
156 presence of baricitinib (1 $\mu$ M) as determined by immunoblotting. Bars represent mean  
157  $\pm$  SD of three biological replicates. (D) Caspase 3/7 activation in apical washes of  
158 SARS-CoV-2 (MOI 1)-infected ALI HBE cultures in the absence or presence of  
159 baricitinib (1 $\mu$ M) 120h post infection. Bars display mean  $\pm$  SD of three biological  
160 replicates. (E) Barrier integrity in SARS-CoV-2 (MOI 1)-infected ALI HBE cultures in  
161 the absence or presence of baricitinib (1 $\mu$ M) measured by TEER at 120h post  
162 infection. Mean  $\pm$  SD of three biological replicates is presented. (F) Immunoblot  
163 indicating cellular levels of proteins involved in interferon signalling in SARS-CoV-2  
164 (MOI 1)-infected ALI HBE cultures at 120h post infection in the presence or absence  
165 of baricitinib (1 $\mu$ M). All P values were calculated by Student's t-test.

166

167 Western blot analysis confirmed that baricitinib not only increased BA.1  
168 replication but also suppressed BA.1-induced interferon signalling (Figure 2F). Taken  
169 together, these findings indicate that the pronounced interferon response induced by  
170 BA.1 is mediated via STAT1 and that it attenuates BA.1 replication.

171

172 **BA.1-induced interferon signalling protects air-liquid-interface (ALI) human**  
 173 **bronchial epithelial (HBE) cell cultures from H1N1 influenza A virus super-**  
 174 **infection**

175 Next, we here infected ALI HBE cultures with BA.1 or Delta (both MOI 1) for  
 176 48h prior to infection with H1N1 influenza A virus (MOI 2) (Figure 3A) to examine  
 177 whether the BA.1-induced interferon response may induce an antiviral state that  
 178 interferes with H1N1 replication. Controls confirmed that both BA.1 and Delta  
 179 replication as well as BA.1- and Delta-induced interferon induction were comparable  
 180 to the data presented in Figure 1 (Suppl. Figure 1).

181

Figure 3

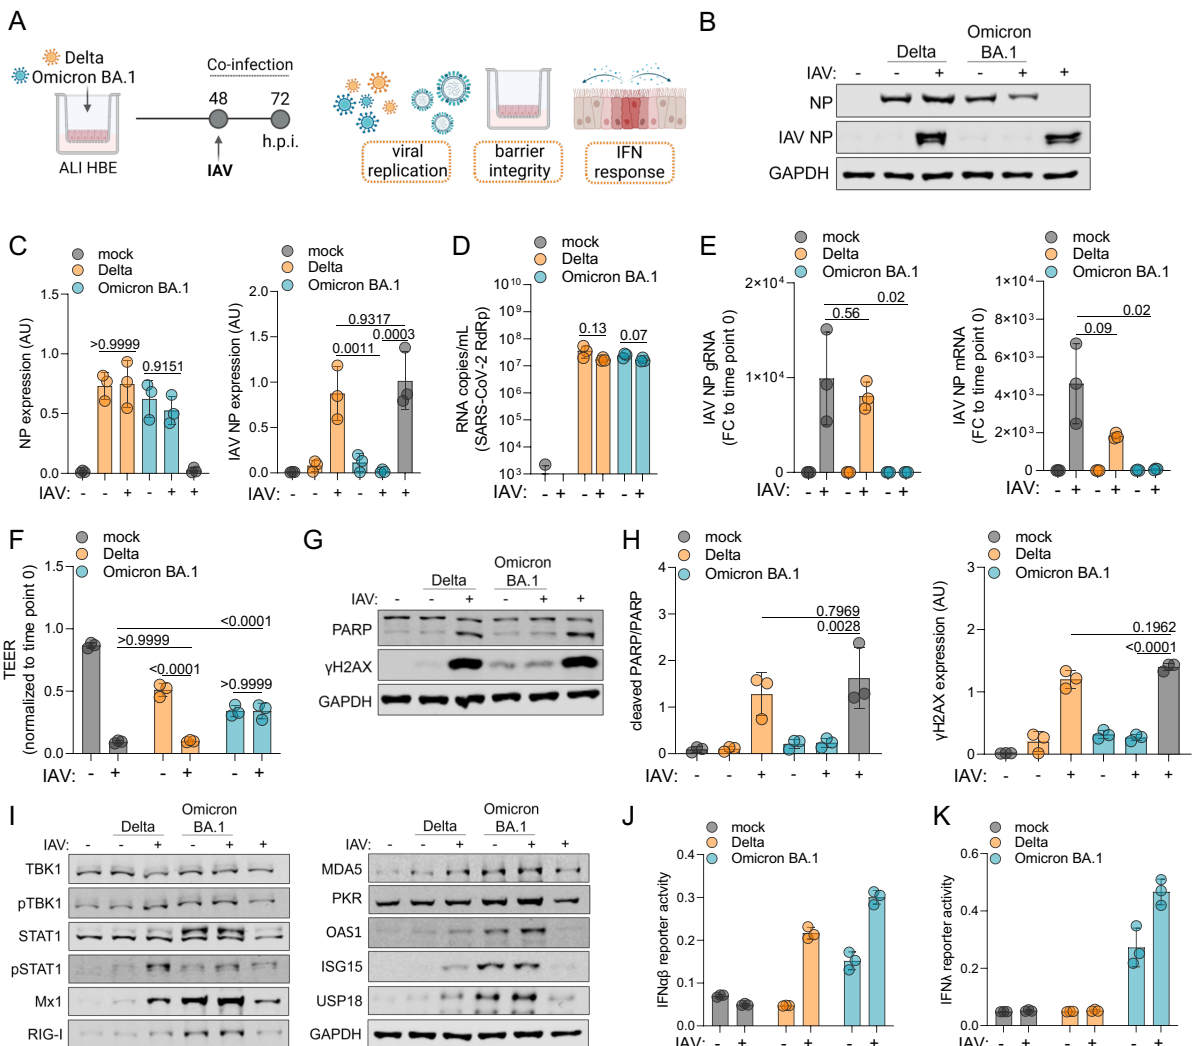

182

183 **Figure 3 Omicron BA.1 but not Delta infection prevents H1N1 influenza A virus**  
184 **(IAV) replication.** (A) Schematic of the experimental set-up. (B) Immunoblot of the  
185 SARS-CoV-2 nucleoprotein (NP) and H1N1 IAV NP levels 24 h post infection with  
186 H1N1 strain A/NewCaledonia/20/99 (MOI 2). (C) Quantification of immunoblots from  
187 (B). Bars represent mean  $\pm$  SD of three biological replicates. P values were calculated  
188 by two-way ANOVA. (D) Genomic RNA copies of the SARS-CoV-2 RNA-dependent  
189 RNA polymerase (RdRp) in the apical wash of ALI HBE cultures 24 hours post  
190 infection with H1N1 (MOI 2). Values represent means  $\pm$  SD of three biological  
191 replicates. P values were determined by Student's t-test. (E) IAV NP genomic RNA  
192 (gRNA, left) or mRNA (right) levels 24h post infection with H1N1 (MOI 2). Bars display  
193 means  $\pm$  SD of three biological replicates. P values were determined by Student's t-  
194 test. (F) Barrier integrity measure by transepithelial electric resistance (TEER) in  
195 single- or co-infected ALI cultures. Bars display means  $\pm$  SD of three biological  
196 replicates. P values were calculated by two-way ANOVA. (G) Immunoblot of PARP  
197 cleavage and  $\gamma$ H2AX after single- or co-infection. (H) Quantification of the  
198 immunoblots from (G). Values represent the mean  $\pm$  SD of three biological replicates.  
199 P values were calculated by two-way ANOVA. (I) Immunoblots displaying the levels of  
200 proteins involved in interferon signalling in single- and co-infected ALI HBE cultures.  
201 (J, K) Interferon (IFN) $\alpha/\beta$  (J) or IFN $\lambda$  (K) signalling in HEK-reporter cell lines incubated  
202 with apical washes of single- and co-infected ALI HBE cultures 24 hours post infection  
203 with H1N1 (MOI 2).

204

205 Determination of H1N1 nucleoprotein (NP) levels indicated that only BA.1 but  
206 not Delta suppressed H1N1 infection in ALI HBE cultures (Figure 3B, Figure 3C).

207 H1N1 super-infection did not significantly reduce SARS-CoV-2 levels in ALI HBE  
208 cultures (Figure 3D).

209 Genomic H1N1 NP RNA and H1N1 NP mRNA levels confirmed that only BA.1  
210 caused a significant reduction of H1N1 replication (Figure 3E). Moreover, only BA.1  
211 infection prevented H1N1-induced cytotoxicity as indicated by transepithelial electric  
212 resistance (TEER) measurement (Figure 3F). Influenza A virus replication is  
213 associated with the induction of apoptosis and DNA damage induction in host cells [Li  
214 et al., 2015; Ampomah & Lim, 2020], and PARP cleavage and  $\gamma$ H2AX levels also  
215 confirmed that BA.1 infection suppressed H1N1-induced cytotoxicity (Figure 3G,  
216 Figure 3H).

217 The analysis of proteins involved in interferon signalling showed that also in the  
218 presence of H1N1 only BA.1 induced a pronounced interferon response (Figure 3I). In  
219 agreement, only BA.1-infected (but not of Delta-infected) ALI HBE cultures produced  
220 biologically active type I ( $\alpha/\beta$ ) and III ( $\lambda$ ) interferons, as demonstrated using HEK-  
221 reporter cell lines (Figure 3J, Figure 3K). Taken together, these findings indicate that  
222 only BA.1 but not Delta induces an interferon-mediated antiviral state in ALI-HBE  
223 cultures that protects them from H1N1 infection.

224

## 225 **Inhibition of JAK/ STAT signalling promotes H1N1 influenza A virus replication** 226 **in BA.1-infected cells**

227 Next, we investigated the effect of the JAK inhibitor on the BA.1-mediated  
228 suppression of H1N1 replication (Figure 4A). In agreement with the data presented in  
229 Figure 2 and Figure 3, baricitinib increased BA.1 replication as indicated by genomic  
230 RNA copies of the viral RNA-dependent RNA polymerase gene (Figure 4B). Moreover,  
231 baricitinib prevented the BA.1-mediated inhibition of H1N1 replication as indicated by

232 H1N1 NP mRNA and genomic RNA levels (Figure 4C) and H1N1 NP protein levels  
233 (Figure 4D, Figure 4E).

234 In line with our previous findings, baricitinib also antagonised BA.1-induced  
235 suppression of H1N1-induced apoptosis as indicated by PARP cleavage and H1N1-  
236 induced DNA damage as indicated by cellular  $\gamma$ H2AX levels (Figure 4F, Figure 4G).  
237 Furthermore, baricitinib abrogated the BA.1-mediated protection of the ALI HBE  
238 barrier integrity from H1N1-induced cytotoxicity (Suppl. Figure 2).  
239

Figure 4

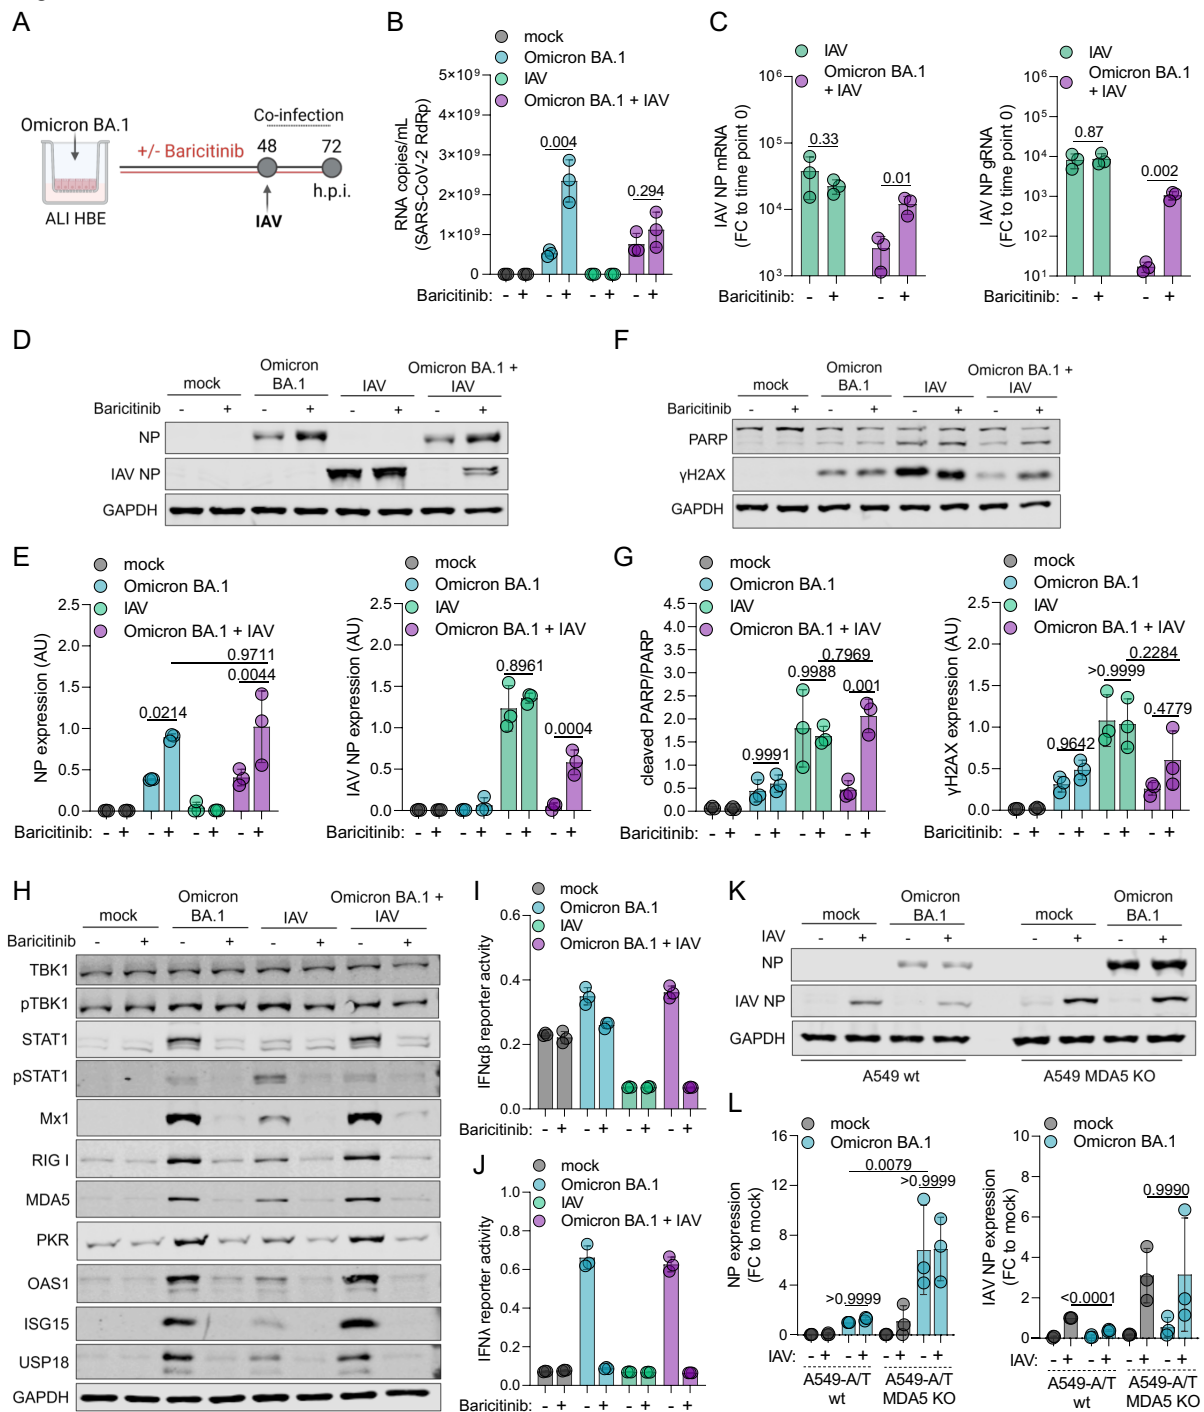

240

241 **Figure 4. Inhibition of JAK/ STAT signalling prevents Omicron BA.1-mediated**

242 **suppression of H1N1 influenza A virus (IAV) replication in air-liquid-interface**

243 **(ALI) human bronchial epithelial (HBE) cultures. (A) Experimental set-up. (B)**

244 **Genomic RNA copy numbers (RNA-dependent RNA polymerase gene = RdRp) in**

245 **apical washes of BA.1 (MOI 1)-infected ALI HBE cultures 72h post infection in the**

246 absence or presence of baricitinib 1 $\mu$ M. Values represent mean  $\pm$  SD of three  
247 biological replicates. P values were determined by Student's t-test. (C) IAV NP mRNA  
248 (left) or genomic RNA (right) levels 24h post H1N1 (MOI 2) infection in the absence or  
249 presence of baricitinib 1 $\mu$ M. Bars represent mean  $\pm$  SD of three biological replicates.  
250 P values were determined by Student's t-test. (D) Immunoblot indicating BA.1 NP and  
251 IAV NP protein levels 72 h post BA.1 infection in the absence or presence of baricitinib  
252 1 $\mu$ M. (E) Quantification of the immunoblot results from (D) by ImageJ. Values  
253 represent mean  $\pm$  SD of three biological replicates. P values were calculated by two-  
254 way ANOVA. (F) Immunoblot indicating PARP cleavage and  $\gamma$ H2AX protein levels 72  
255 h post BA.1 infection in the absence or presence of baricitinib 1 $\mu$ M. (G) Quantification  
256 of the immunoblot results from (F) by ImageJ. Bars represent the quantification of the  
257 ratio between cleaved and total PARP (left) and cellular  $\gamma$ H2AX levels (right). Values  
258 represent mean  $\pm$  SD of three biological replicates. P values were calculated by two-  
259 way ANOVA. (H) Immunoblot displaying levels of proteins involved in interferon  
260 signalling in single- and co-infected ALI HBE cultures in the absence or presence of  
261 baricitinib 1 $\mu$ M. (I, J) Interferon (IFN) $\alpha/\beta$  (I) or  $-\lambda$  (J) activity in HEK reporter cell lines  
262 incubated with apical washes of ALI HBE cultures 72h post infection. (K) BA.1 NP and  
263 IAV NP protein levels in ACE2/ TMPRSS2-transduced A549 (A549-A/T) cells (A549-  
264 A/T wt) or A549-A/T MDA5 knock-out (KO) cells infected with BA.1 at MOI 0.01 for  
265 24h and followed by influenza A virus (IAV) H1N1 (MOI 2) infection for an additional  
266 24h. (L) Quantification of immunoblot results from (K) by ImageJ. Values represent  
267 the mean  $\pm$  SD of three biological replicates. P values were calculated by two-way  
268 ANOVA.  
269

270 As indicated by the cellular levels of proteins involved in interferon signalling,  
271 the BA.1-induced interferon was not affected by of H1N1 (Figure 4H). Moreover,  
272 baricitinib inhibited interferon signalling in response to ALI HBE infection with either  
273 single virus and after co-infection with both viruses (Figure 4H) and suppressed  
274 interferon- $\alpha/\beta$  and - $\lambda$  production (Figure 4I, Figure 4J).

275 The pattern recognition receptor MDA5 was previously shown to be critically  
276 involved in the SARS-CoV-2-mediated, and in particular the BA.1-mediated, interferon  
277 response [Yin et al., 2021; Bojkova et al., 2022; Bojkova et al., 2022a]. In agreement,  
278 BA.1-mediated inhibition of H1N1 infection was abrogated in MDA5 knock-out cells  
279 (Figure 4K, Figure 4L).

280 Taken together, our data show that BA.1-mediated suppression of H1N1  
281 replication depends on the presence of MDA5 and is anatagonised by inhibition of  
282 JAK/ STAT signalling by baricitinib.

283

#### 284 **Similar suppression of H1N1 influenza A virus replication by BA.1 and BA.5**

285 Next, we compared the effects of BA.1 on interferon signalling and H1N1  
286 replication to those of the Omicron subvariant BA.5 (Figure 5A), which is currently  
287 dominant in many parts of the world [Shrestha et al., 2022].

288 BA.1 and BA.5 infection of ALI HBE cultures resulted in similar SARS-CoV-2  
289 NP protein levels (Figure 5B, Figure 5C) and induced similar interferon responses as  
290 indicated by the cellular levels of the interferon-stimulated gene products MX1 and  
291 ISG15 (Figure 5B) as well as interferon- $\alpha/\beta$  (Figure 5D) and - $\lambda$  (Figure 5E) production  
292 in BA.1- and BA.5-infected ALI HBE cultures.

293



Figure 5

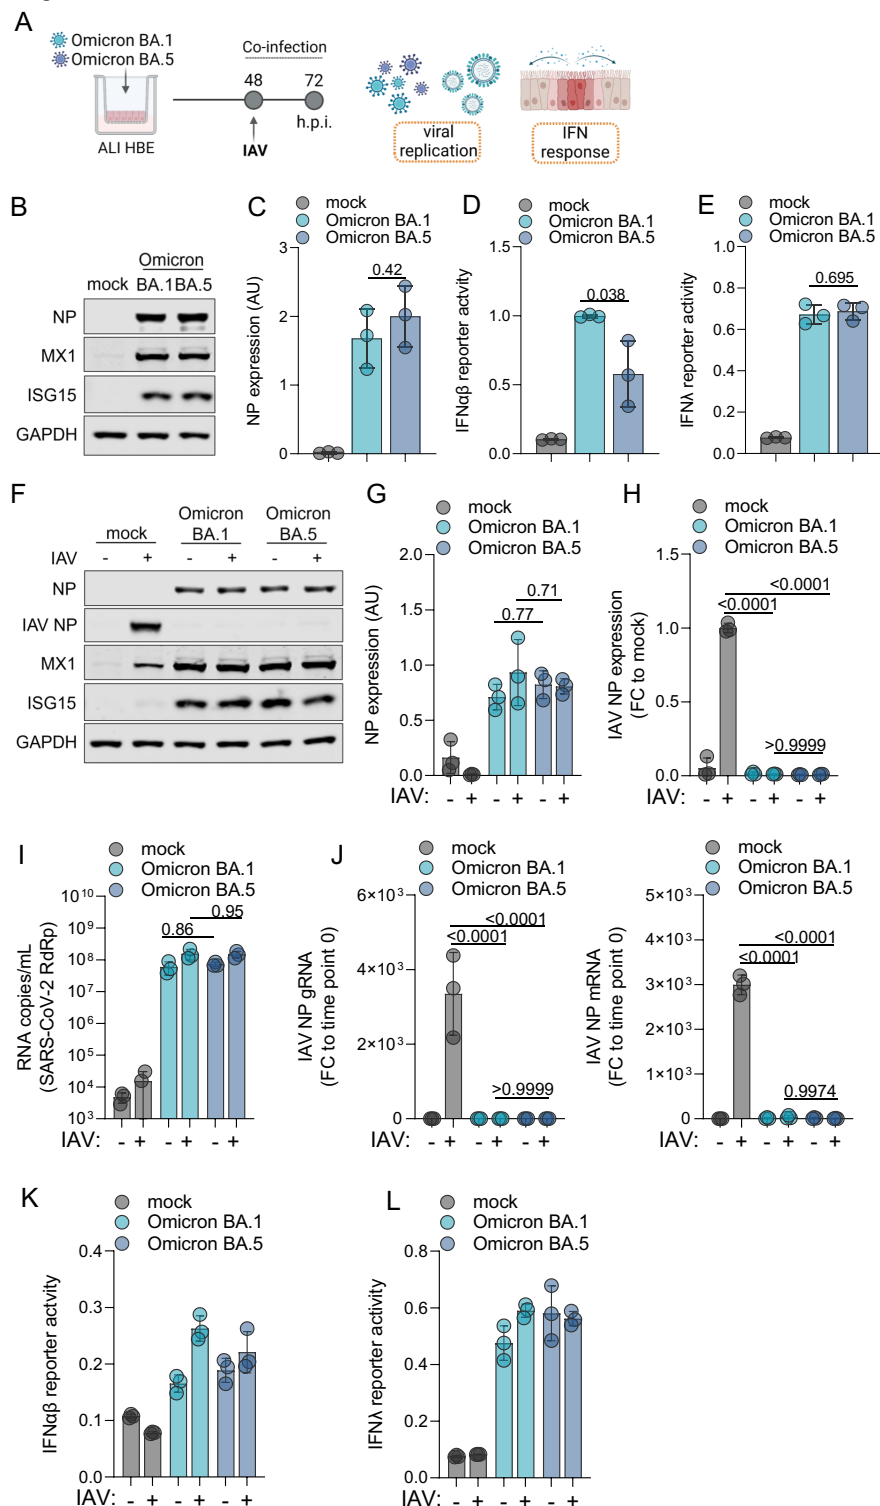

294

295 **Figure 5. Effects of Omicron BA.1 and BA.5 on interferon signalling and H1N1**

296 **influenza A virus replication in air-liquid-interface (ALI) human bronchial**

297 **epithelial (HBE) cell cultures. (A) Experimental design. (B) Cellular levels of the**

298 SARS-CoV-2 nucleoprotein (NP) and proteins involved in interferon signalling (MX1,  
299 ISG15) in BA.1- and BA.5 (MOI 1)-infected ALI HBE cultures 48h post infection. (C)  
300 Quantification of the NP immunoblot results from (B). Values represent mean  $\pm$  SD  
301 from three biological replicates. P values were determined by Student's t-test. (D,E)  
302 Interferon- $\alpha/\beta$  (D) or - $\lambda$  (E) promotor activity in HEK reporter cell lines incubated with  
303 apical washes of BA.1- or BA.5-infected ALI HBE cultures 48h post infection. (F)  
304 SARS-CoV-2 NP (NP), influenza A virus NP (IAV NP), MX1, and ISG15 protein levels  
305 in BA.1 (MOI 1)-infected, BA.5 (MOI 1)-infected, IAV H1N1 (MOI 2)-infected, BA.1/  
306 IAV co-infected, or BA.5/ IAV co-infected ALI HBE cultures. (G,H) Quantification of  
307 SARS-CoV-2 NP (G) and IAV NP (H) levels from (F) by ImageJ. (I) Genomic SARS-  
308 CoV-2 RNA (RNA-dependent RNA polymerase/ RdRp gene) levels in BA.1-infected,  
309 BA.5-infected, BA.1/ IAV co-infected, and BA.5/ IAV co-infected cells 72h post  
310 infection. Values represent mean  $\pm$  SD from three biological replicates. (J) Genomic  
311 IAV NP (gRNA) copy numbers and IAV NP mRNA levels in BA.1-infected, BA.5-  
312 infected, BA.1/ IAV co-infected, and BA.5/ IAV co-infected cells 72h post infection. (K,  
313 L) Interferon- $\alpha/\beta$  (K) or - $\lambda$  (L) promotor activity in HEK reporter cell lines incubated with  
314 apical washes of BA.1-infected, BA.5-infected, BA.1/ IAV co-infected, and BA.5/ IAV  
315 co-infected ALI HBE cultures 72h post infection.

316

317 H1N1 co-infection did not significantly affect cellular SARS-CoV-2 NP levels or  
318 cellular MX1 and ISG15 levels (Figure 5F, Figure 5G). However, both Omicron  
319 subvariants suppressed H1N1 replication as indicated by cellular NP levels (Figure  
320 5F, Figure 5H). These findings (limited impact of influenza A virus infection on SARS-  
321 CoV-2 replication, BA.1- and BA.5-mediated suppression of H1N1 replication) were  
322 confirmed by the determination of genomic SARS-CoV-2 RNA copy numbers (Figure

323 5I), genomic influenza A virus RNA copy numbers (Figure 5J), and H1N1 NP mRNA  
324 levels (Figure 5J). Both variants also induced similar interferon responses in the  
325 presence or absence of H1N1 as indicated by interferon- $\alpha/\beta$  (Figure 5K) and - $\lambda$  (Figure  
326 5L) production.

327 Taken together, BA.1 and BA.5 induce comparable interferon-mediated  
328 antiviral states in ALI HBE cultures that prevent H1N1 replication.

329

### 330 **BA.1-induced interferon signalling prevents H1N1 and H5N1 influenza A virus** 331 **replication in primary human monocytes**

332 Influenza A viruses can replicate in peripheral blood mononuclear cells,  
333 including CD14<sup>+</sup> monocytes [Lersritwimanmaen et al., 2015; Lee et al., 2017], and  
334 interferon signalling in monocytes has been suggested to be a critical determinant of  
335 influenza A virus pathogenesis [Hartshorn, 2020; Fourati et al., 2022]. Highly  
336 pathogenic avian influenza A H5N1 virus has been described to replicate more readily  
337 in monocytes and macrophages than H1N1 [Yu et al., 2011; Hoeve et al., 2012; Cline  
338 et al., 2017; Lee et al., 2017; Lamichhane & Puthavathana, 2018; Lamichhane et al.,  
339 2018; Westenius et al., 2018]. Hence, we finally investigated the impact of BA.1 and  
340 Delta on H1N1 and H5N1 virus infection in primary human monocytes (Figure 6A).

341 The determination of SARS-CoV-2 E mRNA levels by quantitative PCR showed  
342 that BA.1 and Delta did not replicate in primary human monocytes (Figure 6B), which  
343 confirmed previous findings showing that SARS-CoV-2 causes abortive infections in  
344 monocytes [McLaughlin et al., 2021; Junqueira et al., 2022]. Only BA.1 induced a  
345 pronounced interferon response as indicated by interferon  $\alpha/\beta$  signalling in a HEK  
346 reporter cell line incubated with supernatants from infected monocytes (Figure 6C),  
347 MX1 mRNA levels, and ISG15 mRNA levels (Figure 6D). In contrast to the findings in

348 ALI HBE cultures (Figure 1H, Figure 2K, Figure 4J, Figure 5L), supernatants from  
 349 BA.1-infected monocytes did not induce interferon- $\lambda$  activity in a HEK reporter cell line  
 350 (Figure 6C).

Figure 6

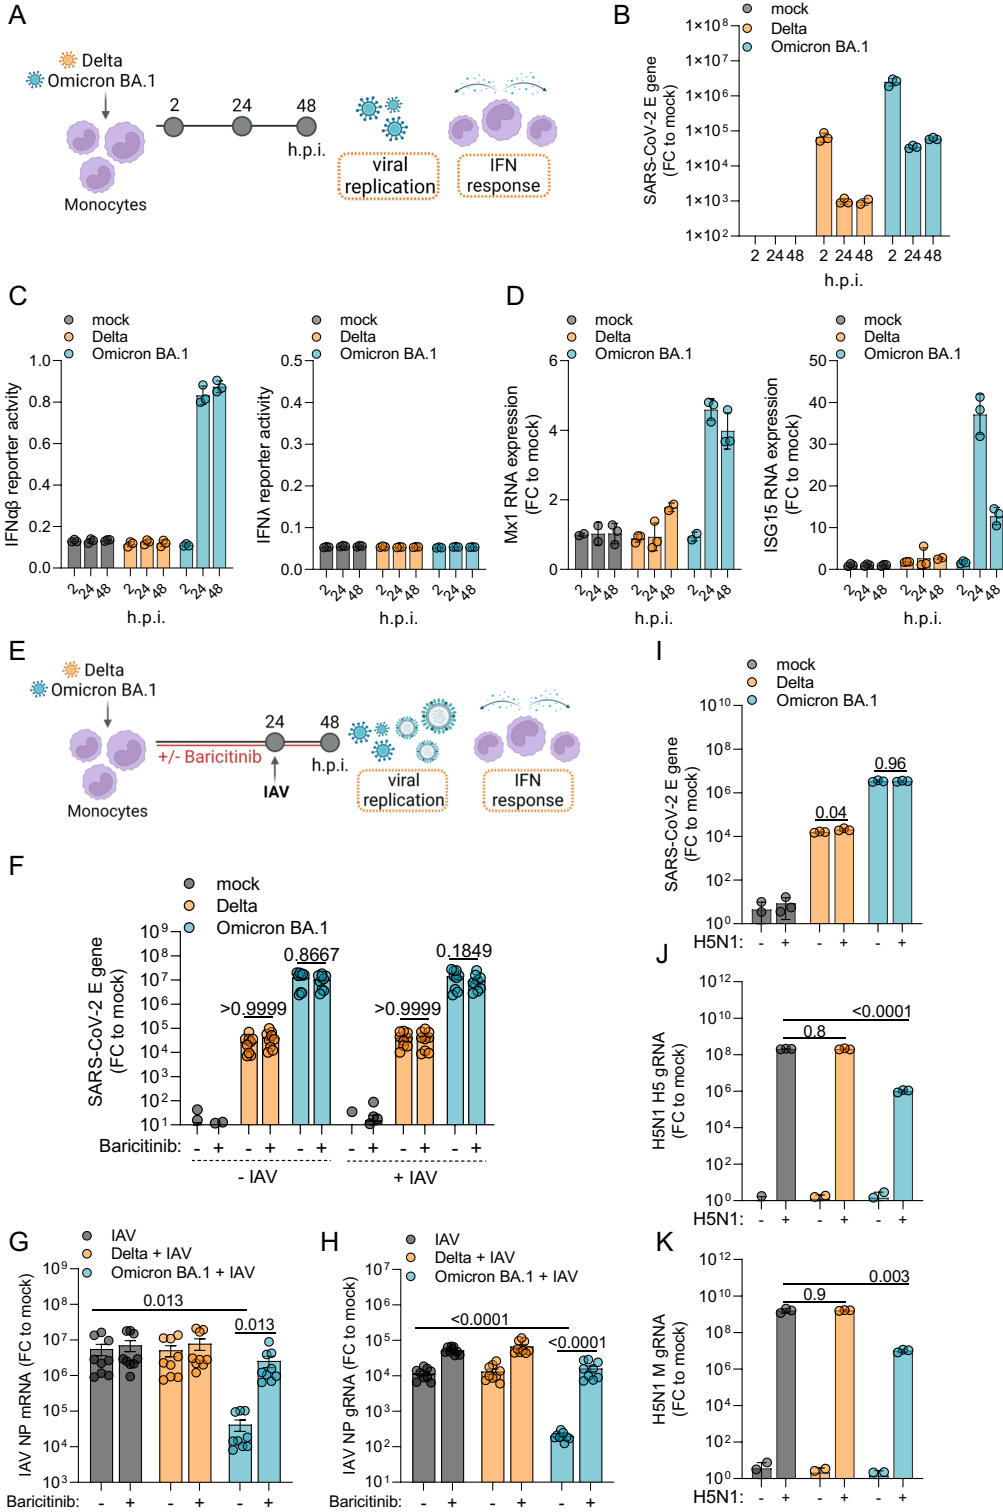

351

352 **Figure 6. Impact of Omicron BA.1 and Delta on H1N1 and H5N1 influenza A virus**  
353 **(IAV) infection of primary human monocytes.** (A) Experimental design underlying  
354 (B-D). (B) SARS-CoV-2 E gene expression levels as determined by quantitative PCR.  
355 Values represent mean  $\pm$  SD of three biological replicates. (C) interferon- $\alpha/\beta$  (IFN $\alpha/\beta$ )  
356 (left) or IFN $\lambda$  (right) activity induced by supernatants of Delta and BA.1 (MOI 1)-  
357 infected primary human monocytes in HEK-reporter cell lines. (D) Mx1 (left) and ISG15  
358 (right) mRNA levels in Delta and BA.1 (MOI 1)-infected primary human monocytes as  
359 indicated by quantitative PCR. (E) Experimental design underlying (F-H). (F) SARS-  
360 CoV-2 E mRNA levels in monocytes infected with Delta (MOI 1), BA.1 (MOI 1), Delta  
361 plus H1N1 IAV (MOI 2), or BA.1 plus H1N1 IAV (MOI 2) in the absence or presence  
362 of baricitinib 1 $\mu$ M. P values were determined by Student's t-test. (G, H) H1N1 IAV NP  
363 mRNA (G) or genomic mRNA (H) levels in monocytes infected with Delta (MOI 1),  
364 BA.1 (MOI 1), Delta plus H1N1 IAV (MOI 2), or BA.1 plus H1N1 IAV (MOI 2) in the  
365 absence or presence of baricitinib 1 $\mu$ M 24h post H1N1 IAV infection. P values were  
366 calculated by two-way ANOVA. (I-K) Impact of BA.1 and Delta infection on highly  
367 pathogenic avian H5N1 IAV virus infection in monocytes. SARS-CoV-2 genomic E  
368 RNA levels (I), genomic H5N1 H5 RNA levels (J), and genomic H5N1 IAV M levels (K)  
369 in monocytes infected with Delta (MOI 1), BA.1 (MOI 1), Delta plus H5N1 strain  
370 A/Vietnam/1203/04 (MOI 1), or BA.1 plus H5N1 (MOI 1). P values were calculated by  
371 two-way ANOVA. All values represent mean  $\pm$  SD of monocyte preparations derived  
372 from three different donors (A-H) or one donor (I-K), which were each tested in three  
373 biological replicates.

374

375 Next, we tested the impact of BA.1 and Delta on H1N1 replication in primary  
376 human monocytes in the absence or presence of the JAK inhibitor baricitinib (Figure

377 6E). Neither baricitinib nor H1N1 infection affect SARS-CoV-2 E mRNA levels (Figure  
378 6F).

379 Similarly as in ALI HBE cultures, however, BA.1 (but not Delta) infection  
380 reduced H1N1 infection as indicated by H1N1 NP mRNA (Figure 6G) and H1N1  
381 genomic NP RNA levels (Figure 6H), which was prevented by baricitinib (Figure 6G,  
382 Figure 6H).

383 Highly pathogenic H5N1 avian influenza A virus also did not affect SARS-CoV-  
384 2 levels in monocytes as indicated by SARS-CoV-2 genomic E RNA levels (Figure 6I).  
385 However, the determination of H5N1 virus genomic H5 (Figure 6J) and M (Figure 6K)  
386 levels showed that abortive BA.1 but not Delta infection inhibited H5N1 replication in  
387 primary human monocytes.

388 Taken together, abortive BA.1 but not Delta infection induced an interferon  
389 response and reduced H1N1 and H5N1 replication in monocytes. The JAK/ STAT  
390 inhibitor prevented BA.1-mediated H1N1 and H5N1 inhibition in monocytes, indicating  
391 that BA.1-mediated influenza A virus inhibition is caused by BA.1-induced interferon  
392 signalling.

393

### 394 **Comparison of the circulation of influenza-like illnesses during the Delta and** 395 **BA.1 infection waves in England**

396 An analysis comparing the spread of influenza-like illnesses (includes cases of  
397 clinically diagnosed influenza with or without a virus test confirmation) and COVID-19  
398 in England showed that both Delta and influenza-like illnesses surged after all  
399 restrictions were removed on 19<sup>th</sup> July 2021. When BA.1 became the dominant variant,  
400 however, the number of influenza-like illnesses strongly declined and has not surged  
401 since (Suppl. Figure 3). These data fit with our findings showing that BA.1 but not Delta

402 induces an interferon response that prevents influenza A virus infection. Similarly, an  
403 analysis of data from the John Hopkins Microbiology Laboratory found a notable  
404 decrease in influenza A virus infections during the Omicron BA.1 wave between  
405 November 2021 and February 2022 [Eldesouki et al., 2022]. However, future research  
406 will have to analyse a possible causative relationship in more detail.

407

408

409

## 410 Discussion

411 Here, we investigated the impact of Delta and the Omicron subvariants BA.1  
412 and BA.5 on interferon signalling in ALI HBE cultures and primary human monocytes.  
413 Our results consistently showed that only Omicron causes pronounced production of  
414 biologically active type I and type III interferons (Suppl. Figure 4). The kinetics of the  
415 interferon type I ( $\alpha/\beta$ ) and type III ( $\lambda$ ) responses provided additional mechanistic  
416 evidence explaining the reduced pathogenicity of Omicron relative to Delta [Wang et  
417 al., 2022]. BA.1 infection caused an early, transient interferon- $\alpha/\beta$  peak, which is  
418 anticipated to mediate a protective antiviral response but also to avoid deleterious  
419 inflammatory processes associated with prolonged interferon type I activation [Forero  
420 et al., 2019; King & Sprent, 2021]. Moreover, BA.1 infection caused a sustained  
421 interferon  $\lambda$  response known to inhibit virus replication and prevent excessive  
422 inflammation in the respiratory tract [Forero et al., 2019; Prokunina-Olsson et al., 2020;  
423 King & Sprent, 2021].

424 The Omicron-induced interferon response generated an antiviral state that  
425 protected infected cells from super-infection with influenza A viruses, showing that the  
426 Omicron-induced interferon response is of functional relevance. Our analysis of the  
427 spread of influenza-like illnesses during the Delta and BA.1 infection waves (Suppl.  
428 Figure 3) and data from the John Hopkins Microbiology Laboratory [Eldesouki et al.,  
429 2022] found that the levels of influenza A virus transmission levels strongly declined  
430 with the emergence of BA.1, but a causative relationship remains to be established.

431 Despite consistent BA.1-mediated interferon induction across the different cell  
432 types, the relative replication kinetics of Omicron and Delta differed between the  
433 models. BA.1 replicated less effectively than Delta in Caco-2F03 and Calu-3 [Bojkova  
434 et al., 2022; Bojkova et al., 2022a], but (in agreement with other findings [Hui et al.,



435 2022]) faster than Delta in ALI HBE cultures. This probably reflects the contribution of  
436 many factors to SARS-CoV-2 replication. The spike (S) proteins of the BA.1 and Delta  
437 isolates that we used differ in 13 amino acid positions in the S receptor binding domain  
438 (Suppl. Figure 5). For example, BA.1 S is known to interact differently with its cellular  
439 receptor ACE2, to utilise ACE2 from a broader range of species as receptor, and to  
440 mediate increased virus uptake [Cameroni et al., 2022; Hong et al., 2022; Li et al.,  
441 2022; Meng et al., 2022; Rathnasinge et al., 2022; Willett et al., 2022; Zhang et al.,  
442 2022].

443 Increased BA.1 uptake may also contribute to the enhanced interferon  
444 response. Mechanistically, the BA.1-induced interferon response is, in agreement with  
445 previous studies in other cell types [Yin et al., 2021; Bojkova et al., 2022; Bojkova et  
446 al., 2022a], primarily mediated by the recognition of double-stranded RNA by the  
447 pattern recognition receptor MDA5, as suggested by the lack of a BA.1-induced  
448 interferon in MDA5 knock-out cells. In this context, virus uptake via the endosomal  
449 pathway was described to result in greater activation of pattern recognition receptors  
450 [Peacock et al., 2022].

451 BA.1 infection also induced an interferon-mediated antiviral state preventing  
452 influenza A (H1N1, H5N1) infection in monocytes despite only establishing an abortive  
453 infection, demonstrating that the antiviral state does not depend on a complete virus  
454 replication cycle resulting in the production of infectious virus. In agreement, UV-  
455 inactivated BA.1 had previously been shown to trigger a detectable interferon  
456 response in lung organ cultures, although this response was weaker than that induced  
457 by the replication-competent virus [Alfi et al., 2022].

458 The JAK/ STAT inhibitor baricitinib inhibited the Omicron-mediated antiviral  
459 response. This suggests that the Omicron-induced antiviral state is caused by MDA5-

460 mediated production of interferon which activates interferon receptors that then trigger  
461 JAK/ STAT signalling [Li et al., 2020].

462 In addition to these findings, we also showed that BA.5, which is currently the  
463 dominant variant in many parts of the world [Shrestha et al., 2022], induces a  
464 comparable interferon response to BA.1 and that the BA.1- and BA.5-induced  
465 interferon responses protect infected cells from super-infection with influenza A  
466 viruses. The latter finding demonstrates that the BA.1- and BA.5-induced interferon  
467 signalling is of functional relevance. Baricitinib prevented the BA.1- and BA.5-induced  
468 suppression of influenza A virus replication, providing evidence that the BA.1- and  
469 BA.5-induced interferon response is responsible for the BA.1 and BA.5-induced  
470 influenza A virus inhibition.

471 In summary, we show that BA.1 and BA.5 (but not Delta) induce a functionally  
472 relevant pronounced interferon response that suppresses influenza A virus replication.  
473 Further research will have to show the relevance of our findings in the context of  
474 SARS-CoV-2/ influenza virus co-infection. Data on the severity of SARS-CoV-2/  
475 influenza A virus co-infections are inconsistent in cell culture and animal models  
476 [Andrés et al., 2022; Kim EH et al., 2022; Kim HK et al., 2022; Oishi et al., 2022] and  
477 in humans [Cuadrado-Payán et al., 2020; Yue et al., 2020; Alosaimi et al., 2021; Stowe  
478 et al., 2021; Xiang et al., 2021; Krumbein et al., 2022; Swets et al., 2022]. This may  
479 not be a surprise, given the differences in interferon signalling between different  
480 SARS-CoV-2 variants that we present here and that were described in previous  
481 studies [Alfi et al., 2022; Bojkova et al., 2022; Bojkova et al., 2022a; Guo et al., 2022;  
482 Thorne et al., 2022]. Future studies may have to include more different virus variants  
483 and strains to establish a clearer picture.

484           In conclusion, our findings show that 1) BA.1 and BA.5 induce comparable  
485 interferon responses in ALI HBE cultures, 2) the Omicron-induced interferon-response  
486 is of functional relevance as it protects infected cells from influenza A virus replication,  
487 and 3) abortive BA.1 infection of monocytes is sufficient to produce a protective  
488 interferon response. Moreover, the kinetics of the Omicron-induced interferon  
489 response (early and transient type I response, sustained type III response) provide  
490 additional mechanistic evidence explaining why Omicron infections are usually  
491 associated with less severe disease than Delta infections.  
492

## 493 **Methods**

### 494 **Cell lines**

495 HEK293 (HEK-Blue™ reporter cells, InvivoGen) -IFN- $\alpha/\beta$  and -IFN- $\lambda$  cells were  
496 cultivated in DMEM (Gibco, ThermoFisher Scientific) with 10% heat-inactivated foetal  
497 bovine serum (Sigma), Pen-Strep (100 U/ml-100  $\mu$ g/ml) (Sigma), 100  $\mu$ g/ml  
498 Normocin™ (InvivoGen) and the required selective antibiotic for each cell line (IFN-  
499  $\alpha/\beta$ : Blastocidin and Zeocin; IFN- $\lambda$ , Blastocidin, Puromycin, and Zeocin) at 37°C and 5%  
500 CO<sub>2</sub>.

501 A549-ACE2/TMPRSS2 cells (Invivogen) were grown in DMEM supplemented with 2  
502 mM L-glutamine, 4.5 g/l glucose, 10% (v/v) heat-inactivated fetal bovine serum (FBS;  
503 30 min at 56 °C), PenStrep (100 U/ml-100  $\mu$ g/ml), 100  $\mu$ g/ml Normocin, 10  $\mu$ g/ml of  
504 Blastocidin, 10  $\mu$ g/ml of Blastocidin, 100  $\mu$ g/ml of Hygromycin, 0.5  $\mu$ g/ml of Puromycin,  
505 and 100  $\mu$ g/ml of Zeocin. A549-ACE2/TMPRSS2 MDA5 KO cells (Invivogen) were  
506 grown in DMEM supplemented with 2 mM L-glutamine, 4.5 g/l glucose, 10% (v/v) heat-  
507 inactivated fetal bovine serum (FBS; 30 min at 56 °C), PenStrep (100 U/ml-100  $\mu$ g/ml),  
508 100  $\mu$ g/ml Normocin, 10  $\mu$ g/ml of Blastocidin, 100  $\mu$ g/ml of Hygromycin, 0.5  $\mu$ g/ml of  
509 Puromycin, and 100  $\mu$ g/ml of Zeocin.

510 All cell lines were regularly tested for mycoplasma contamination.

511

### 512 **Air-liquid interface cultures**

513 Lung tissue for the isolation of primary epithelial cells was provided by the Hannover  
514 Medical School, Institute of Pathology (Hannover, Germany). The use of tissue was  
515 approved by the ethics committee of the Hannover Medical School (MHH, Hannover,  
516 Germany, number 2701–2015) and was in compliance with The Code of Ethics of the  
517 World Medical Association. Primary bronchial epithelial cells were isolated from the

518 lung explant tissue of a patient with lung emphysema as described previously [van  
519 Wetering et al., 2000]. All patients or their next of kin gave written informed consent  
520 for the use of their lung tissue for research.

521 Basal cells were expanded in Keratinocyte-SFM medium supplemented with bovine  
522 pituitary extract (25 µg/mL), human recombinant epidermal growth factor (0.2 ng/mL,  
523 all from Gibco, Schwerte, Germany), isoproterenol (1 nM, Sigma),  
524 Antibiotic/Antimycotic Solution (Sigma-Aldrich), and MycoZap Plus PR (Lonza,  
525 Cologne, Germany) and cryopreserved until further use.

526 For differentiation, the cells were thawed and passaged once in PneumaCult-  
527 Ex Medium (StemCell Technologies, Cologne, Germany) and then seeded on  
528 transwell inserts (12-well plate, Sarstedt, Nümbrecht, Germany) at  $4 \times 10^4$  cells/insert.  
529 Once the cell layers reached confluency, the medium on the apical side of the  
530 transwell was removed, and medium in the basal chamber was replaced with  
531 PneumaCult ALI Maintenance Medium (StemCell Technologies), including  
532 Antibiotic/Antimycotic Solution (Sigma-Aldrich) and MycoZap Plus PR (Lonza). During  
533 a period of four weeks, the medium was changed and the cell layers were washed  
534 with PBS every other day. Criteria for successful differentiation were the development  
535 of ciliated cells and ciliary movement, an increase in transepithelial electric resistance  
536 indicative of the formation of tight junctions, and mucus production.

537

### 538 **SARS-CoV-2 variants preparation**

539 The SARS-CoV-2 isolates Omicron BA.1 (B.1.1.529: FFM-SIM0550/2021,  
540 EPI\_ISL\_6959871, GenBank ID OL800702), Delta (B.1.167.2: FFM-IND8424/2021,  
541 GenBank ID MZ315141), and Omicron BA.5 (GenBank ID OP062267) were isolated  
542 in Caco-2-F03 cells as previously described [Cinatl et al., 2004; Bojkova et al., 2021]

543 and stored at  $-80^{\circ}\text{C}$ . All variants underwent maximum two passages. Virus titres were  
544 determined as TCID<sub>50</sub>/mL.

545

#### 546 **Influenza A virus strains H1N1 and H5N1**

547 The H1N1 influenza strain A/NewCaledonia/20/99 was received from the World  
548 Health organisation (WHO) Influenza Centre (National Institute for Medical Research,  
549 London, UK) and stocks were prepared by cultivation on MDCK cells (ATCC, CCL-34)  
550 in medium containing 2µg/ml trypsin. Virus stocks were stored at  $-80^{\circ}\text{C}$ . Virus titres  
551 were determined as TCID<sub>50</sub>/mL.

552 The H5N1 influenza strain A/Vietnam/1203/04 was received from the World  
553 Health organisation (WHO) Influenza Centre (National Institute for Medical Research,  
554 London, UK). Virus stocks were prepared by infecting Vero cells, and aliquots were  
555 stored at  $-80^{\circ}\text{C}$ . Virus titres were determined as TCID<sub>50</sub>/mL.

556

#### 557 **Barrier integrity measurement**

558 For trans-epithelial electrical resistance (TEER) measurement, medium was  
559 added to the apical side 30min prior to measurement with a chopstick electrode  
560 connected to a Volt-Ohm-meter (Millicell® ERS-2, Merck, Darmstadt, Germany)  
561 according to the manufacturer's instructions. Blank inserts served as baseline. The  
562 apical medium was removed after the measurement.

563

#### 564 **Activation of caspase 3/7**

565 Caspase 3/7 activity was measured using the Caspase-Glo assay kit  
566 (Promega, Madison, WI, USA), according to the manufacturer's instructions. Briefly,  
567 100 µL of Caspase-Glo reagent were added to each well containing 100 µL of tested

568 sample, mixed, and incubated at room temperature for 30 min. Luminescence intensity  
569 was measured using an Infinite M200 microplate reader (Tecan).

570

### 571 **Co-infection assay in ALI HBE**

572 ALI HBE cultures were infected with SARS-CoV-2 variant at MOI 1 from the  
573 apical site. The inoculum was incubated for 2 h, then removed and cells were washed  
574 three times with PBS. H1N1 A/NewCaledonia/20/99 at MOI 2 was added 48 h post  
575 SARS-CoV-2 infection. The inoculum was incubated for 2 h, then removed and cells  
576 were washed three times with PBS.

577

### 578 **Detection of extracellular and intracellular RNA**

579 SARS-CoV-2 RNA from the apical washes of the ALI HBE culture was isolated  
580 using QIAamp Viral RNA Kit (Qiagen, Hilden, Germany) according to the  
581 manufacturer's instructions. RNA was subjected to OneStep qRT-PCR analysis using  
582 the Luna Universal One-Step RT-qPCR Kit (New England Biolabs, Frankfurt am Main,  
583 Germany) and a CFX96 Real-Time System, C1000 Touch Thermal Cycler (Bio-Rad,  
584 Feldkirchen, Germany). Primers were adapted from the WHO protocol<sup>29</sup> targeting the  
585 open reading frame for RNA-dependent RNA polymerase (RdRp): RdRP\_SARSr-F2  
586 (GTG ARA TGG TCA TGT GTG GCG G) and RdRP\_SARSr-R1 (CAR ATG TTA AAS  
587 ACA CTA TTA GCA TA) using 0.4 µM per reaction. Standard curves were created  
588 using plasmid DNA (pEX-A128-RdRP) as previously described [Bojkova et al., 2020].

589 Intracellular RNA isolation was carried out according to manufacturer's protocol  
590 (RNeasy 96 QIAcube HT Kit, Qiagen, Hilden, Germany). Detection of selected targets  
591 was performed with Luna® Universal One-Step RT-qPCR (New England BioLabs Inc.)  
592 according to manufacturers protocol using specific primers: TBP (fw:5'-

593 ATCAGAACAACAGCCTGCC-3'; rev: 5'- GGTCAGTCCAGTGCCATAAG-3'); SARS-  
594 CoV-2 E gene (fw:5'- ACAGGTACGTTAATAGTTAATAGCGT-3'; rev:5'-  
595 ATATTGCAGCAGTACGCACACA-3'); ISG15 (fw:5'-GAGAGGCAGCGAACTCATCT-  
596 3'; rev:5'-AGGGAC ACCTGGAATTCGTT-3'); MX1 (fw:5'-  
597 TTTTCAAGAAGGAGGCCAGCAA-3'; rev:5'-TCAGGAACTTCCGCTTGTCG-3');  
598 H5N1 H5 gene (fw:5'-GCCATTCCACAACATACACCC-3'; rev:5'-  
599 CTCCCCTGCTCATTGCTATG-3'); H5N1 M gene (fw:5'-  
600 TTCTAACCGAGGTCGAAACG-3'; rev:5'-ACAAAGCGTCTACGCTGCAG-3'); IAV  
601 NP-mRNA (fw:5'- GACTCACATGATGATCTGGCA-3'; rev:5'-  
602 CTTGTTCTCCGTCCATTCTCA-3'); IAV NP-gRNA (fw:5'-  
603 AACGGCTGGTCTGACTCACATGAT-3'; rev:5'-  
604 AGTGAGCACATCCTGGGATCCATT-3').

605

## 606 Immunoblot analysis

607 Whole-cell lysates were prepared using Triton-X sample buffer containing  
608 protease inhibitor cocktail (Roche). The protein concentration was assessed by using  
609 DC Protein assay reagent (Bio-Rad Laboratories). Equal protein loads were separated  
610 by sodium dodecyl sulfate-polyacrylamide gel electrophoresis and proteins were  
611 transferred to nitrocellulose membranes (Thermo Scientific). For protein detection the  
612 following primary antibodies were used at the indicated dilutions: GAPDH (Cell  
613 Signaling, #2118, 1:4000),  $\gamma$ H2AX (Cell Signaling, #9718, 1:1000), H1N1 (Influenza A  
614 Virus) Nucleoprotein (Bioss, #bs-4976R, 1:4000), ISG15 (Santa Cruz Biotechnology,  
615 #sc-166755, 1:200), MDA5 (Cell Signaling, #5321, 1:1000), Mx1 (Cell Signaling,  
616 #37849, 1:1000), OAS1 (Cell Signaling, #14498, 1:1000), PARP (Cell Signaling,  
617 #9542, 1:1000), PKR (Cell Signaling, #12297, 1:1000), SARS-CoV-2 Nucleocapsid



618 (Sino Biological, #40143-R019, 1:10000), STAT1 (Cell Signaling, #9172, 1:1000),  
619 phospho-STAT1 Y701 (Cell Signaling, #9171, 1:1000), TBK1 (Cell Signaling, #3013,  
620 1:1000), phospho-TBK1 S172 (Cell Signaling, #5483, 1:1000), USP18 (Cell Signaling,  
621 #4813, 1:2000) and RIG1 (Cell Signaling, #3743, 1:1000). Protein bands were  
622 visualised using IRDye-labeled secondary antibodies at dilution 1:40000 (LI-COR  
623 Biotechnology, IRDye®800CW Goat anti-Rabbit, #926-32211 and IRDye®800CW  
624 Goat anti-Mouse IgG, #926-32210) and Odyssey Infrared Imaging System (LI-COR  
625 Biosciences).

626

### 627 **Detection of type I and type III IFNs production**

628       Detection of type I and type III IFNs in supernatants was carried out with HEK-  
629 Blue™ IFN- $\alpha/\beta$  (type I) and HEK-Blue™ IFN- $\lambda$  (type III) cells according to  
630 manufacturer's protocol. HEK cells were washed twice with PBS and detached in  
631 presence of PBS by tapping the flask. Cells were subsequently centrifuged at 200g for  
632 5 min and resuspended in Test Medium (DMEM, 4.5 g/l glucose, 2 mM L-glutamine,  
633 10% (v/v) heat-inactivated FBS, 50 U/ml penicillin, 50  $\mu$ g/ml streptomycin, 100  $\mu$ g/ml  
634 Normocin™) at 280.000 cells/ml. 20 $\mu$ l supernatant were added in 96 well plates and  
635 180  $\mu$ l cell suspension was added to the wells. Cells and supernatant were incubated  
636 at 37°C and 5% CO<sub>2</sub> for 24h. After incubation, 20  $\mu$ l supernatant was removed and  
637 incubated with 180  $\mu$ l QUANTI-Blue™ Solution for 1-3 h. SEAP (secreted embryonic  
638 alkaline phosphatase) levels were determined using a spectrophotometer at 620nm.

639

### 640 **PBMCS isolation**

641       Human peripheral blood mononuclear cells were isolated from buffy coats of  
642 healthy donors (RK-Blutspendedienst Baden-Württemberg-Hessen, Institut für

643 Transfusionsmedizin und Immunhämatologie Frankfurt am Main, Germany). After  
644 centrifugation on a Ficoll (Pancoll, PAN-Biotech, Aidenbach, Germany) density  
645 gradient, mononuclear cells were collected from the interface, washed with PBS, and  
646 plated on cell culture dishes (Cell+, Saarstedt, Nümbrecht, Germany) in RPMI1640  
647 (Gibco, ThermoFisher Scientific, Waltham, MA, USA) supplemented with 100 IU/mL  
648 penicillin and 100 g/mL streptomycin. After incubation for 90 min(37°C, 5% CO<sub>2</sub>), non-  
649 adherent cells were removed, and the medium was changed to RPMI1640  
650 supplemented with 100 IU/mL penicillin, 100 µg/mL of streptomycin, and 3% human  
651 serum (RK-Blutspendedienst Baden-Württemberg-Hessen, Institut für  
652 Transfusionsmedizin und Immunhämatologie Frankfurt am Main, Germany).

653

#### 654 **Co-infection assay in human PBMCs**

655 Human PBMCs were infected with SARS-CoV-2 variants at MOI of 1 for 2 h in  
656 infection medium (RPMI1640 supplemented with 100 IU/mL penicillin and 100 g/mL  
657 streptomycin, 1% heat-inactivated fetal bovine serum) at 37°C at 5% CO<sub>2</sub>. Afterwards  
658 the cells were washed twice with PBS and incubated for 24 h in infection medium. For  
659 co-infection, the cells were either infected with influenza A virus H1N1/New  
660 Caledonia/20/99 (MOI 2), influenza A virus H5N1 A/Vietnam/1203/04 (MOI 1) or  
661 treated with medium for 2 h, washed twice and incubated again for 24 h. After each  
662 washing step and after 48 h supernatant samples were taken and cells were lysed for  
663 RNA isolation.

664

#### 665 **Statistics**

666 Results are expressed as the mean ± standard deviation (SD) of the number of  
667 biological replicates indicated in figure legends. Statistical significance is depicted

668 directly in graphs and the statistical tests used for the calculation of p values are  
669 indicated in the figure legends. GraphPad Prism 9 was used for visualisation of the  
670 data and for calculation of statistical significance.  
671

672 **Acknowledgements**

673           We thank Lena Stegman, Kerstin Euler, and Sebastian Grothe for their  
674 technical assistance.

675 **Funding**

676           This work was supported by the Frankfurter Stiftung für krebskranke Kinder,  
677 the Goethe-Corona-Fonds, and the BMBF (COVID-Protect, FZ: 01KI20143A).

678 **Competing interests**

679           The authors declare no competing interests.

680

681

## 682 **References**

- 683 Alfi O, Hamdan M, Wald O, Yakirevitch A, Wandel O, Oiknine-Djian E, Gvili B, Knoller  
684 H, Rozendorn N, Golan Berman H, Adar S, Vorontsov O, Mandelboim M, Zakay-  
685 Rones Z, Oberbaum M, Panet A, Wolf DG. SARS-CoV-2 Omicron Induces Enhanced  
686 Mucosal Interferon Response Compared to other Variants of Concern, Associated  
687 with Restricted Replication in Human Lung Tissues. *Viruses*. 2022 Jul 21;14(7):1583.  
688 doi: 10.3390/v14071583.
- 689 Alosaimi B, Naeem A, Hamed ME, Alkadi HS, Alanazi T, Al Rehily SS, Almutairi AZ,  
690 Zafar A. Influenza co-infection associated with severity and mortality in COVID-19  
691 patients. *Virol J*. 2021 Jun 14;18(1):127. doi: 10.1186/s12985-021-01594-0.
- 692 Ampomah PB, Lim LHK. Influenza A virus-induced apoptosis and virus propagation.  
693 *Apoptosis*. 2020 Feb;25(1-2):1-11. doi: 10.1007/s10495-019-01575-3.
- 694 Bastard P, Zhang Q, Zhang SY, Jouanguy E, Casanova JL. Type I interferons and  
695 SARS-CoV-2: from cells to organisms. *Curr Opin Immunol*. 2022 Feb;74:172-182. doi:  
696 10.1016/j.coi.2022.01.003.
- 697 Bojkova D, Klann K, Koch B, Widera M, Krause D, Ciesek S, Cinatl J, Münch C.  
698 Proteomics of SARS-CoV-2-infected host cells reveals therapy targets. *Nature*. 2020  
699 Jul;583(7816):469-472. doi: 10.1038/s41586-020-2332-7.
- 700 Bojkova D, McGreig JE, McLaughlin KM, Masterson SG, Antczak M, Widera M,  
701 Krähling V, Ciesek S, Wass MN, Michaelis M, Cinatl J Jr. Differentially conserved  
702 amino acid positions may reflect differences in SARS-CoV-2 and SARS-CoV  
703 behaviour. *Bioinformatics*. 2021 Feb 9;37(16):2282-8. doi:  
704 10.1093/bioinformatics/btab094.

705 Bojkova D, Widera M, Ciesek S, Wass MN, Michaelis M, Cinatl J jr. Reduced interferon  
706 antagonism but similar drug sensitivity in Omicron variant compared to Delta variant  
707 SARS-CoV-2 isolates. *Cell Res.* 2022 Mar;32(3):319-321.

708 Bojkova D, Rothenburger T, Ciesek S, Wass MN, Michaelis M, Cinatl J Jr. SARS-CoV-  
709 2 Omicron variant virus isolates are highly sensitive to interferon treatment. *Cell*  
710 *Discov.* 2022a May 10;8(1):42.

711 Bojkova D, Reus P, Panosch L, Bechtel M, Rothenburger T, Kandler J, Pfeiffer A,  
712 Wagner JUG, Shumliakivska M, Dimmeler S, Olmer R, Martin U, Vondran F, Toptan  
713 T, Rothweiler F, Zehner R, Rabenau H, Osman KL, Pullan ST, Carroll M, Stack R,  
714 Ciesek R, Wass MN, Michaelis M, Cinatl J Jr. Identification of novel antiviral drug  
715 candidates using an optimized SARS-CoV-2 phenotypic screening platform. *bioRxiv.*  
716 2022b Jul 17:2022.07.17.500346. doi: 10.1101/2022.07.17.500346.

717 Borrelli M, Corcione A, Castellano F, Fiori Nastro F, Santamaria F. Coronavirus  
718 Disease 2019 in Children. *Front Pediatr.* 2021 May 28;9:668484. doi:  
719 10.3389/fped.2021.668484.

720 Cameroni E, Bowen JE, Rosen LE, Saliba C, Zepeda SK, Culap K, Pinto D,  
721 VanBlargan LA, De Marco A, di Iulio J, Zatta F, Kaiser H, Noack J, Farhat N,  
722 Czudnochowski N, Havenar-Daughton C, Sprouse KR, Dillen JR, Powell AE, Chen A,  
723 Maher C, Yin L, Sun D, Soriaga L, Bassi J, Silacci-Fregni C, Gustafsson C, Franko  
724 NM, Logue J, Iqbal NT, Mazzitelli I, Geffner J, Grifantini R, Chu H, Gori A, Riva A,  
725 Giannini O, Ceschi A, Ferrari P, Cippà PE, Franzetti-Pellanda A, Garzoni C, Halfmann  
726 PJ, Kawaoka Y, Hebner C, Purcell LA, Piccoli L, Pizzuto MS, Walls AC, Diamond MS,  
727 Telenti A, Virgin HW, Lanzavecchia A, Snell G, Veessler D, Corti D. Broadly neutralizing  
728 antibodies overcome SARS-CoV-2 Omicron antigenic shift. *Nature.* 2022  
729 Feb;602(7898):664-670. doi: 10.1038/s41586-021-04386-2.

730 Chiale C, Greene TT, Zuniga EI. Interferon induction, evasion, and paradoxical roles  
731 during SARS-CoV-2 infection. *Immunol Rev.* 2022 Jul 1. doi: 10.1111/imr.13113.

732 Cinatl J Jr, Hoever G, Morgenstern B, Preiser W, Vogel JU, Hofmann WK, Bauer G,  
733 Michaelis M, Rabenau HF, Doerr HW. Infection of cultured intestinal epithelial cells  
734 with severe acute respiratory syndrome coronavirus. *Cell Mol Life Sci.* 2004  
735 Aug;61(16):2100-12. doi: 10.1007/s00018-004-4222-9.

736 Cline TD, Beck D, Bianchini E. Influenza virus replication in macrophages: balancing  
737 protection and pathogenesis. *J Gen Virol.* 2017 Oct;98(10):2401-2412. doi:  
738 10.1099/jgv.0.000922.

739 Cuadrado-Payán E, Montagud-Marrahi E, Torres-Elorza M, Bodro M, Blasco M, Poch  
740 E, Soriano A, Piñeiro GJ. SARS-CoV-2 and influenza virus co-infection. *Lancet.* 2020  
741 May 16;395(10236):e84. doi: 10.1016/S0140-6736(20)31052-7.

742 Eldesouki RE, Uhteg K, Mostafa HH. The circulation of Non-SARS-CoV-2 respiratory  
743 viruses and coinfections with SARS-CoV-2 during the surge of the Omicron variant. *J*  
744 *Clin Virol.* 2022 Aug;153:105215. doi: 10.1016/j.jcv.2022.105215.

745 Forero A, Ozarkar S, Li H, Lee CH, Hemann EA, Nadjombati MS, Hendricks MR, So  
746 L, Green R, Roy CN, Sarkar SN, von Moltke J, Anderson SK, Gale M Jr, Savan R.  
747 Differential Activation of the Transcription Factor IRF1 Underlies the Distinct Immune  
748 Responses Elicited by Type I and Type III Interferons. *Immunity.* 2019 Sep  
749 17;51(3):451-464.e6. doi: 10.1016/j.immuni.2019.07.007.

750 Fourati S, Jimenez-Morales D, Hultquist J, Chang MW, Benner C, Krogan N, Pache  
751 L, Chanda S, Sekaly R-P, García-Sastre A, Uccellini MB. Type I IFN promotes  
752 pathogenic inflammatory monocyte maturation during H5N1 infection. *bioRxiv.* 2022  
753 Jan 11:2022.01.10.475751. doi: 10.1101/2022.01.10.475751.

754 Guo K, Barrett BS, Morrison JH, Mickens KL, Vladar EK, Hasenkrug KJ, Poeschla EM,  
755 Santiago ML. Interferon resistance of emerging SARS-CoV-2 variants. *Proc Natl Acad*  
756 *Sci U S A*. 2022 Aug 9;119(32):e2203760119. doi: 10.1073/pnas.2203760119.

757 Hartshorn KL. Innate Immunity and Influenza A Virus Pathogenesis: Lessons for  
758 COVID-19. *Front Cell Infect Microbiol*. 2020 Oct 22;10:563850. doi:  
759 10.3389/fcimb.2020.563850.

760 Hoeve MA, Nash AA, Jackson D, Randall RE, Dransfield I. Influenza virus A infection  
761 of human monocyte and macrophage subpopulations reveals increased susceptibility  
762 associated with cell differentiation. *PLoS One*. 2012;7(1):e29443. doi:  
763 10.1371/journal.pone.0029443.

764 Hong Q, Han W, Li J, Xu S, Wang Y, Xu C, Li Z, Wang Y, Zhang C, Huang Z, Cong  
765 Y. Molecular basis of receptor binding and antibody neutralization of Omicron. *Nature*.  
766 2022 Apr;604(7906):546-552. doi: 10.1038/s41586-022-04581-9.

767 Hu B, Chan JF, Liu H, Liu Y, Chai Y, Shi J, Shuai H, Hou Y, Huang X, Yuen TT, Yoon  
768 C, Zhu T, Zhang J, Li W, Zhang AJ, Zhou J, Yuan S, Zhang BZ, Yuen KY, Chu H.  
769 Spike mutations contributing to the altered entry preference of SARS-CoV-2 Omicron  
770 BA.1 and BA.2. *Emerg Microbes Infect*. 2022 Aug 30:1-31. doi:  
771 10.1080/22221751.2022.2117098.

772 Hui KPY, Ho JCW, Cheung MC, Ng KC, Ching RHH, Lai KL, Kam TT, Gu H, Sit KY,  
773 Hsin MKY, Au TWK, Poon LLM, Peiris M, Nicholls JM, Chan MCW. SARS-CoV-2  
774 Omicron variant replication in human bronchus and lung ex vivo. *Nature*. 2022  
775 Mar;603(7902):715-720. doi: 10.1038/s41586-022-04479-6.

776 Junqueira C, Crespo Â, Ranjbar S, de Lacerda LB, Lewandrowski M, Ingber J, Parry  
777 B, Ravid S, Clark S, Schimpf MR, Ho F, Beakes C, Margolin J, Russell N, Kays K,  
778 Boucau J, Das Adhikari U, Vora SM, Leger V, Gehrke L, Henderson LA, Janssen E,



779 Kwon D, Sander C, Abraham J, Goldberg MB, Wu H, Mehta G, Bell S, Goldfeld AE,  
780 Filbin MR, Lieberman J. FcγR-mediated SARS-CoV-2 infection of monocytes  
781 activates inflammation. *Nature*. 2022 Jun;606(7914):576-584. doi: 10.1038/s41586-  
782 022-04702-4.

783 Kim EH, Nguyen TQ, Casel MAB, Rollon R, Kim SM, Kim YI, Yu KM, Jang SG, Yang  
784 J, Poo H, Jung JU, Choi YK. Coinfection with SARS-CoV-2 and Influenza A Virus  
785 Increases Disease Severity and Impairs Neutralizing Antibody and CD4+ T Cell  
786 Responses. *J Virol*. 2022 Mar 23;96(6):e0187321. doi: 10.1128/jvi.01873-21.

787 Kim HK, Kang JA, Lyoo KS, Le TB, Yeo YH, Wong SS, Na W, Song D, Webby RJ,  
788 Zanin M, Jeong DG, Yoon SW. Severe acute respiratory syndrome coronavirus 2 and  
789 influenza A virus co-infection alters viral tropism and haematological composition in  
790 Syrian hamsters. *Transbound Emerg Dis*. 2022 Jun 1:10.1111/tbed.14601. doi:  
791 10.1111/tbed.14601.

792 King C, Sprent J. Dual Nature of Type I Interferons in SARS-CoV-2-Induced  
793 Inflammation. *Trends Immunol*. 2021 Apr;42(4):312-322. doi:  
794 10.1016/j.it.2021.02.003.

795 Krumbein H, Kümmel LS, Fragkou PC, Thölken C, Hünerbein BL, Reiter R,  
796 Papathanasiou KA, Renz H, Skevaki C. Respiratory viral co-infections in patients with  
797 COVID-19 and associated outcomes: A systematic review and meta-analysis. *Rev*  
798 *Med Virol*. 2022 Jun 10:e2365. doi: 10.1002/rmv.2365.

799 Lamichhane PP, Boonnak K, Changsom D, Noisumdaeng P, Sangsiriwut K,  
800 Pattanakitsakul SN, Puthavathana P. H5N1 NS genomic segment distinctly governs  
801 the influenza virus infectivity and cytokine induction in monocytic cells. *Asian Pac J*  
802 *Allergy Immunol*. 2018 Mar;36(1):58-68.

803 Lamichhane PP, Puthavathana P. PR8 virus harbouring H5N1 NS gene contributed  
804 for THP-1 cell tropism. *Virusdisease*. 2018 Dec;29(4):548-552. doi: 10.1007/s13337-  
805 018-0499-4.

806 Lee ACY, To KKW, Zhu H, Chu H, Li C, Mak WWN, Zhang AJX, Yuen KY. Avian  
807 influenza virus A H7N9 infects multiple mononuclear cell types in peripheral blood and  
808 induces dysregulated cytokine responses and apoptosis in infected monocytes. *J Gen  
809 Virol*. 2017 May;98(5):922-934. doi: 10.1099/jgv.0.000751.

810 Lersritwimanmaen P, Na-Ek P, Thanunchai M, Thewsoongnoen J, Sa-Ard-lam N,  
811 Wiboon-ut S, Mahanonda R, Thitithanyanont A. The presence of monocytes enhances  
812 the susceptibility of B cells to highly pathogenic avian influenza (HPAI) H5N1 virus  
813 possibly through the increased expression of  $\alpha$ 2,3 SA receptor. *Biochem Biophys Res  
814 Commun*. 2015 Aug 28;464(3):888-93. doi: 10.1016/j.bbrc.2015.07.061.

815 Li N, Parrish M, Chan TK, Yin L, Rai P, Yoshiyuki Y, Abolhassani N, Tan KB, Kiraly O,  
816 Chow VT, Engelward BP. Influenza infection induces host DNA damage and dynamic  
817 DNA damage responses during tissue regeneration. *Cell Mol Life Sci*. 2015  
818 Aug;72(15):2973-88. doi: 10.1007/s00018-015-1879-1.

819 Li Y, Yu P, Qu C, Li P, Li Y, Ma Z, Wang W, de Man RA, Peppelenbosch MP, Pan Q.  
820 MDA5 against enteric viruses through induction of interferon-like response partially via  
821 the JAK-STAT cascade. *Antiviral Res*. 2020 Apr;176:104743. doi:  
822 10.1016/j.antiviral.2020.104743.

823 Li L, Han P, Huang B, Xie Y, Li W, Zhang D, Han P, Xu Z, Bai B, Zhou J, Kang X, Li  
824 X, Zheng A, Zhang R, Qiao S, Zhao X, Qi J, Wang Q, Liu K, Gao GF. Broader-species  
825 receptor binding and structural bases of Omicron SARS-CoV-2 to both mouse and  
826 palm-civet ACE2s. *Cell Discov*. 2022 Jul 12;8(1):65. doi: 10.1038/s41421-022-00431-  
827 0.

828 McKellar J, Rebendenne A, Wencker M, Moncorgé O, Goujon C. Mammalian and  
829 Avian Host Cell Influenza A Restriction Factors. *Viruses*. 2021 Mar 22;13(3):522. doi:  
830 10.3390/v13030522.

831 McLaughlin KM, Bojkova D, Kandler JD, Bechtel M, Reus P, Le T, Rothweiler F,  
832 Wagner JUG, Weigert A, Ciesek S, Wass MN, Michaelis M, Cinatl J Jr. A Potential  
833 Role of the CD47/SIRPalpha Axis in COVID-19 Pathogenesis. *Curr Issues Mol Biol*.  
834 2021 Sep 22;43(3):1212-1225. doi: 10.3390/cimb43030086.

835 Meng B, Abdullahi A, Ferreira IATM, Goonawardane N, Saito A, Kimura I, Yamasoba  
836 D, Gerber PP, Fatihi S, Rathore S, Zepeda SK, Papa G, Kemp SA, Ikeda T, Toyoda  
837 M, Tan TS, Kuramochi J, Mitsunaga S, Ueno T, Shirakawa K, Takaori-Kondo A,  
838 Brevini T, Mallery DL, Charles OJ; CITIID-NIHR BioResource COVID-19  
839 Collaboration; Genotype to Phenotype Japan (G2P-Japan) Consortium; Ecuador-  
840 COVID19 Consortium, Bowen JE, Joshi A, Walls AC, Jackson L, Martin D, Smith KGC,  
841 Bradley J, Briggs JAG, Choi J, Madisson E, Meyer KB, Mlcochova P, Ceron-  
842 Gutierrez L, Doffinger R, Teichmann SA, Fisher AJ, Pizzuto MS, de Marco A, Corti D,  
843 Hosmillo M, Lee JH, James LC, Thukral L, Veessler D, Sigal A, Sampaziotis F,  
844 Goodfellow IG, Matheson NJ, Sato K, Gupta RK. Altered TMPRSS2 usage by SARS-  
845 CoV-2 Omicron impacts infectivity and fusogenicity. *Nature*. 2022 Mar;603(7902):706-  
846 714. doi: 10.1038/s41586-022-04474-x.

847 Oishi K, Horiuchi S, Minkoff JM, tenOever BR. The Host Response to Influenza A Virus  
848 Interferes with SARS-CoV-2 Replication during Coinfection. *J Virol*. 2022 Aug  
849 10;96(15):e0076522. doi: 10.1128/jvi.00765-22.

850 Peacock TP, Goldhill DH, Zhou J, Baillon L, Frise R, Swann OC, Kugathasan R, Penn  
851 R, Brown JC, Sanchez-David RY, Braga L, Williamson MK, Hassard JA, Staller E,  
852 Hanley B, Osborn M, Giacca M, Davidson AD, Matthews DA, Barclay WS. The furin

853 cleavage site in the SARS-CoV-2 spike protein is required for transmission in ferrets.  
854 Nat Microbiol. 2021 Jul;6(7):899-909. doi: 10.1038/s41564-021-00908-w.

855 Prokunina-Olsson L, Alphonse N, Dickenson RE, Durbin JE, Glenn JS, Hartmann R,  
856 Kotenko SV, Lazear HM, O'Brien TR, Odendall C, Onabajo OO, Piontkivska H, Santer  
857 DM, Reich NC, Wack A, Zanoni I. COVID-19 and emerging viral infections: The case  
858 for interferon lambda. J Exp Med. 2020 May 4;217(5):e20200653. doi:  
859 10.1084/jem.20200653.

860 Rani MR, Croze E, Wei T, Shrock J, Josyula A, Kalvakolanu DV, Ransohoff RM.  
861 STAT-phosphorylation-independent induction of interferon regulatory factor-9 by  
862 interferon-beta. J Interferon Cytokine Res. 2010 Mar;30(3):163-70. doi:  
863 10.1089/jir.2009.0032.

864 Rathnasinghe R, Jangra S, Ye C, Cupic A, Singh G, Martínez-Romero C, Mulder LCF,  
865 Kehrer T, Yildiz S, Choi A, Yeung ST, Mena I, Gillespie V, De Vriese J, Aslam S,  
866 Stadlbauer D, Meekins DA, McDowell CD, Balaraman V, Corley MJ, Richt JA, De  
867 Geest BG, Miorin L; PVI study group, Krammer F, Martinez-Sobrido L, Simon V,  
868 García-Sastre A, Schotsaert M. Characterization of SARS-CoV-2 Spike mutations  
869 important for infection of mice and escape from human immune sera. Nat Commun.  
870 2022 Jul 7;13(1):3921. doi: 10.1038/s41467-022-30763-0.

871 Shrestha LB, Foster C, Rawlinson W, Tedla N, Bull RA. Evolution of the SARS-CoV-  
872 2 omicron variants BA.1 to BA.5: Implications for immune escape and transmission.  
873 Rev Med Virol. 2022 Jul 20:e2381. doi: 10.1002/rmv.2381.

874 Shuai H, Chan JF, Hu B, Chai Y, Yuen TT, Yin F, Huang X, Yoon C, Hu JC, Liu H, Shi  
875 J, Liu Y, Zhu T, Zhang J, Hou Y, Wang Y, Lu L, Cai JP, Zhang AJ, Zhou J, Yuan S,  
876 Brindley MA, Zhang BZ, Huang JD, To KK, Yuen KY, Chu H. Attenuated replication

877 and pathogenicity of SARS-CoV-2 B.1.1.529 Omicron. *Nature*. 2022  
878 Mar;603(7902):693-699. doi: 10.1038/s41586-022-04442-5.

879 Stowe J, Tessier E, Zhao H, Guy R, Muller-Pebody B, Zambon M, Andrews N, Ramsay  
880 M, Lopez Bernal J. Interactions between SARS-CoV-2 and influenza, and the impact  
881 of coinfection on disease severity: a test-negative design. *Int J Epidemiol*. 2021 Aug  
882 30;50(4):1124-1133. doi: 10.1093/ije/dyab081.

883 Swets MC, Russell CD, Harrison EM, Docherty AB, Lone N, Girvan M, Hardwick HE;  
884 ISARIC4C Investigators, Visser LG, Openshaw PJM, Groeneveld GH, Semple MG,  
885 Baillie JK. SARS-CoV-2 co-infection with influenza viruses, respiratory syncytial virus,  
886 or adenoviruses. *Lancet*. 2022 Apr 16;399(10334):1463-1464. doi: 10.1016/S0140-  
887 6736(22)00383-X.

888 Thorne LG, Bouhaddou M, Reuschl AK, Zuliani-Alvarez L, Polacco B, Pelin A, Batra  
889 J, Whelan MVX, Hosmillo M, Fossati A, Ragazzini R, Jungreis I, Ummadi M, Rojc A,  
890 Turner J, Bischof ML, Obernier K, Braberg H, Soucheray M, Richards A, Chen KH,  
891 Harjai B, Memon D, Hiatt J, Rosales R, McGovern BL, Jahun A, Fabius JM, White K,  
892 Goodfellow IG, Takeuchi Y, Bonfanti P, Shokat K, Jura N, Verba K, Noursadeghi M,  
893 Beltrao P, Kellis M, Swaney DL, García-Sastre A, Jolly C, Towers GJ, Krogan NJ.  
894 Evolution of enhanced innate immune evasion by SARS-CoV-2. *Nature*. 2022  
895 Feb;602(7897):487-495. doi: 10.1038/s41586-021-04352-y.

896 van Wetering S, van der Linden AC, van Sterkenburg MA, de Boer WI, Kuijpers AL,  
897 Schalkwijk J, Hiemstra PS. Regulation of SLPI and elafin release from bronchial  
898 epithelial cells by neutrophil defensins. *Am J Physiol Lung Cell Mol Physiol*. 2000  
899 Jan;278(1):L51-8. doi: 10.1152/ajplung.2000.278.1.L51.

900 Wang C, Liu B, Zhang S, Huang N, Zhao T, Lu QB, Cui F. Differences in incidence  
901 and fatality of COVID-19 by SARS-CoV-2 Omicron variant versus Delta variant in

- 902 relation to vaccine coverage: a world-wide review. *J Med Virol.* 2022 Sep 2. doi:  
903 10.1002/jmv.28118.
- 904 Westenius V, Mäkelä SM, Julkunen I, Österlund P. Highly Pathogenic H5N1 Influenza  
905 A Virus Spreads Efficiently in Human Primary Monocyte-Derived Macrophages and  
906 Dendritic Cells. *Front Immunol.* 2018 Jul 17;9:1664. doi: 10.3389/fimmu.2018.01664.
- 907 Xiang X, Wang ZH, Ye LL, He XL, Wei XS, Ma YL, Li H, Chen L, Wang XR, Zhou Q.  
908 Co-infection of SARS-COV-2 and Influenza A Virus: A Case Series and Fast Review.  
909 *Curr Med Sci.* 2021 Feb;41(1):51-57. doi: 10.1007/s11596-021-2317-2.
- 910 Yin X, Riva L, Pu Y, Martin-Sancho L, Kanamune J, Yamamoto Y, Sakai K, Gotoh S,  
911 Miorin L, De Jesus PD, Yang CC, Herbert KM, Yoh S, Hultquist JF, García-Sastre A,  
912 Chanda SK. MDA5 Governs the Innate Immune Response to SARS-CoV-2 in Lung  
913 Epithelial Cells. *Cell Rep.* 2021 Jan 12;34(2):108628. doi:  
914 10.1016/j.celrep.2020.108628.
- 915 Yu WC, Chan RW, Wang J, Travanty EA, Nicholls JM, Peiris JS, Mason RJ, Chan  
916 MC. Viral replication and innate host responses in primary human alveolar epithelial  
917 cells and alveolar macrophages infected with influenza H5N1 and H1N1 viruses. *J*  
918 *Virol.* 2011 Jul;85(14):6844-55. doi: 10.1128/JVI.02200-10.
- 919 Yue H, Zhang M, Xing L, Wang K, Rao X, Liu H, Tian J, Zhou P, Deng Y, Shang J.  
920 The epidemiology and clinical characteristics of co-infection of SARS-CoV-2 and  
921 influenza viruses in patients during COVID-19 outbreak. *J Med Virol.* 2020  
922 Nov;92(11):2870-2873. doi: 10.1002/jmv.26163.
- 923 Zhang J, Cai Y, Lavine CL, Peng H, Zhu H, Anand K, Tong P, Gautam A, Mayer ML,  
924 Rits-Volloch S, Wang S, Sliz P, Wesemann DR, Yang W, Seaman MS, Lu J, Xiao T,  
925 Chen B. Structural and functional impact by SARS-CoV-2 Omicron spike mutations.  
926 *Cell Rep.* 2022 Apr 26;39(4):110729. doi: 10.1016/j.celrep.2022.110729.
