# Supplementary material for: Omicron-induced interferon signalling prevents influenza A virus infection
Source: bioRxiv or medRxiv preprint supplement (doi:10.1101/2022.09.06.506799), 2022-09-06
Supplement: Supplementary file [file media-2.pdf]

Suppl. Figure 2

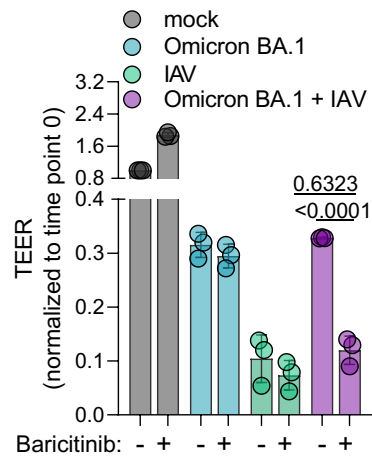

**Supplementary Figure 2. Impact of BA.1 and influenza A virus (IAV) infection on the barrier integrity of air-liquid-interface (ALI) human bronchial epithelial (HBE) cell cultures in the presence or absence of baricitinib.** Cells were infected as described in Figure 4 and the transepithelial electric resistance (TEER) was measured 72h post infection with BA.1. Values represent mean  $\pm$  SD of three biological replicates. P values were calculated by two-way ANOVA.
