# Supplementary material for: Omicron-induced interferon signalling prevents influenza A virus infection
Source: bioRxiv or medRxiv preprint supplement (doi:10.1101/2022.09.06.506799), 2022-09-06
Supplement: Supplementary file [file media-4.pdf]

Suppl. Figure 4

A

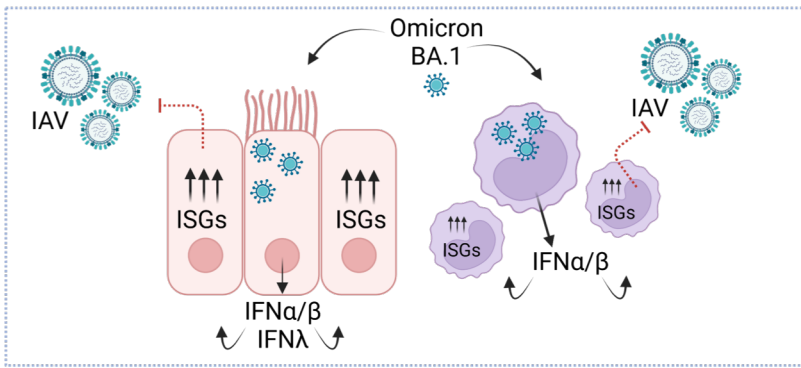

B

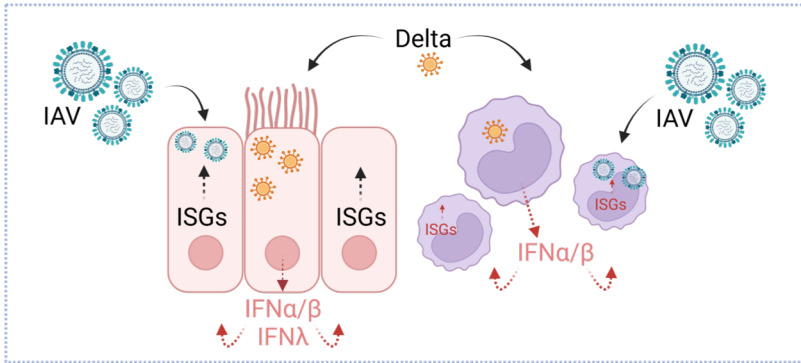

**Supplementary Figure 4. Overview of the study findings.** SARS-CoV-2 Omicron BA.1 and BA.5 (A) but not Delta (B) induce an interferon-mediated antiviral state that protects infected cells from influenza A virus infection.
